# Supplementary material for: Rhodium(iii)-catalyzed alkylation of primary C(sp3)–H bonds with α-diazocarbonyl compounds
Source: Royal Society of Chemistry journal article supplement (doi:10.1039/c6cc03846h), 2016-01-01

# **Rhodium(III)-Catalyzed Alkylation of Primary C(sp<sup>3</sup>)-H Bonds with $\alpha$ -Diazocarbonyl Compounds**

*Wei Hou, Yaxi Yang, Yunxiang Wu, Huijin Feng, Yuanchao Li and Bing Zhou<sup>\*[a,b]</sup>*

<sup>a</sup> Department of Medicinal Chemistry, Shanghai Institute of Materia Medica, Chinese Academy of Sciences, 555 Zu Chong Zhi Road, Shanghai 201203, PR China.

<sup>b</sup> University of Chinese Academy of Sciences, No.19A Yuquan Road, Beijing 100049, China

Email: [zhoubing@simmm.ac.cn](mailto:zhoubing@simmm.ac.cn); [zhoubing2012@hotmail.com](mailto:zhoubing2012@hotmail.com);

## Table of contents:

|                                                                                        |    |
|----------------------------------------------------------------------------------------|----|
| General Methods and Materials.....                                                     | 2  |
| Table S1. Optimization of Rh(III)-catalyzed coupling of <b>1a</b> with <b>2a</b> ..... | 2  |
| Experimental Procedures and Characterizations.....                                     | 3  |
| <sup>1</sup> H and <sup>13</sup> C NMR Spectra of Compounds.....                       | 20 |

### General methods:

All commercially available organic compounds were purchased from Sigma-Aldrich, Shanghai GeorGene Biotech Co., Ltd and adamas-beta in China.  $^1\text{H}$  NMR (400 or 300 MHz) and  $^{13}\text{C}$  NMR (125, 100 MHz) spectra were determined with  $\text{CDCl}_3$  as solvent and tetramethylsilane (TMS) as internal standard. Chemical shifts were reported in ppm from internal TMS ( $\delta$ ). All coupling constants ( $J$  values) were reported in hertz (Hz). High-resolution mass spectra were recorded using the ESI method. Reactions were monitored by thin-layer chromatography or LC-MS analysis. Column chromatography (petroleum ether/ethyl acetate) was performed on silica gel (200-300 mesh).

### Materials:

All reagents were purchased from commercial sources and used without further purification, unless otherwise indicated.  $[\text{Cp}^*\text{RhCl}_2]_2$ ,<sup>S1</sup>  $[\text{Cp}^*\text{Rh}(\text{MeCN})_3][\text{SbF}_6]_2$ ,<sup>S2</sup> 8-methyl-quinolines substrates,<sup>S3</sup>  $\alpha$ -diazocarbonyl compounds<sup>S4</sup> were prepared according to the previously reported synthetic methods.

Table S1. Optimization of Rh(III)-catalyzed coupling of **1a** with **2a** <sup>[a]</sup>

| 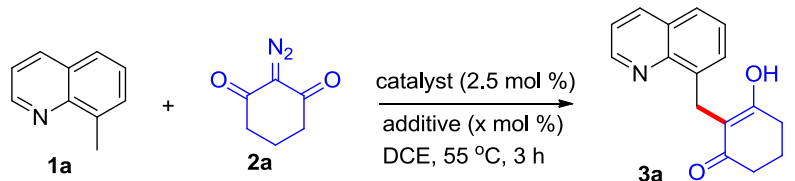 |                                                       |                           |           |
|--------------------------------------------------------------------------------------|-------------------------------------------------------|---------------------------|-----------|
| entry                                                                                | catalyst (2.5 mol %)                                  | additive (x mol %)        | yield (%) |
| 1                                                                                    | $(\text{Cp}^*\text{RhCl}_2)_2$                        | -                         | 0         |
| 2                                                                                    | $(\text{Cp}^*\text{RhCl}_2)_2/\text{AgSbF}_6$         | -                         | 50        |
| 3                                                                                    | $\text{Cp}^*\text{Rh}(\text{MeCN})_3(\text{SbF}_6)_2$ | -                         | 65        |
| 4                                                                                    | $\text{Cp}^*\text{Rh}(\text{MeCN})_3(\text{SbF}_6)_2$ | $\text{CsOAc}$ (50 mol %) | 60        |
| 5                                                                                    | $\text{Cp}^*\text{Rh}(\text{MeCN})_3(\text{SbF}_6)_2$ | $\text{AcOH}$ (100 mol %) | 95        |
| 6                                                                                    | $\text{Cp}^*\text{Rh}(\text{MeCN})_3(\text{SbF}_6)_2$ | $\text{CuCl}_2$ (5 mol %) | 30        |

|   |                                                       |                                     |    |
|---|-------------------------------------------------------|-------------------------------------|----|
| 7 | $\text{Cp}^*\text{Rh}(\text{MeCN})_3(\text{SbF}_6)_2$ | $\text{Cu}(\text{OAc})_2$ (5 mol %) | 99 |
| 8 | -                                                     | $\text{Cu}(\text{OAc})_2$ (5 mol %) | 0  |

[a] Reaction conditions: **1a** (0.2 mmol), **2a** (0.3 mmol), catalyst (2.5 mol %), additive (x mol %), DCE (1.0 mL), 55 °C, 3 h. Yields of isolated products.

### Experimental Procedures and Characterizations:

a) General procedure for the synthesis of **3** (taking **3a** as an example):

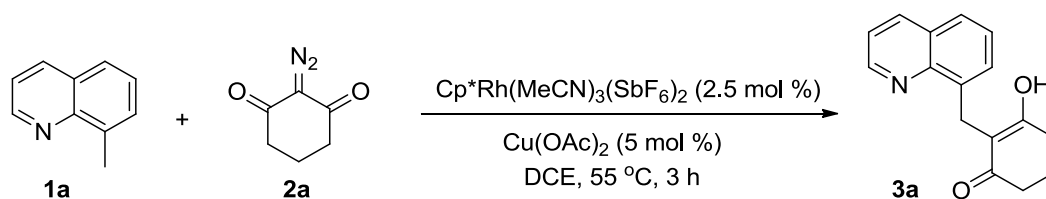

$\text{Cp}^*\text{Rh}(\text{MeCN})_3(\text{SbF}_6)_2$  (2.5 mol %),  $\text{Cu}(\text{OAc})_2$  (5 mol %), 8-methylquinoline **1a** (0.2 mmol), diazo compound **2a** (0.3 mmol, 1.5 equiv) and DCE (2 mL, 0.1 M) were added to a test tube. The reaction mixture was stirred at 55 °C for 3 h. The solution was filtered through a celite pad and washed with dichloromethane. Then, the solvent was removed under reduced pressure and the residue was purified by silica gel chromatography using PE/EA to afford the title compound **3a**.

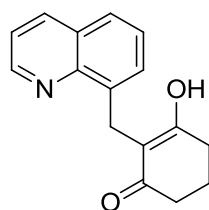

The title compound **3a** was isolated (PE:EA = 5:1) as a light brown solid, yield: 99%;  $^1\text{H}$  NMR (400 MHz,  $\text{CDCl}_3$ )  $\delta$  13.95 (s, 1H), 8.84 (dd,  $J$  = 4.4, 1.6 Hz, 1H), 8.26 (dd,  $J$  = 8.4, 1.6 Hz, 1H), 8.07 (dd,  $J$  = 7.2, 1.2 Hz, 1H), 7.70 (dd,  $J$  = 8.0, 1.2 Hz, 1H), 7.52 (dd,  $J$  = 8.0, 7.2 Hz, 1H), 7.48 (dd,  $J$  = 8.4, 4.4 Hz, 1H), 4.08 (s, 2H), 2.42 (t,  $J$  = 6.0 Hz, 2H), 2.29 (t,  $J$  = 6.0 Hz, 2H), 1.90 (p,  $J$  = 6.4 Hz, 2H);  $^{13}\text{C}$  NMR (125 MHz,  $\text{CDCl}_3$ )  $\delta$  198.3, 174.3, 147.5, 145.0, 138.9, 138.4, 132.4, 128.7, 127.6, 125.9, 120.8, 114.7, 36.9, 29.9, 25.3, 20.7; HRMS (ESI): Calcd for  $\text{C}_{16}\text{H}_{16}\text{NO}_2$   $[\text{M}+\text{H}]^+$  254.1176,

Found: 254.1171.

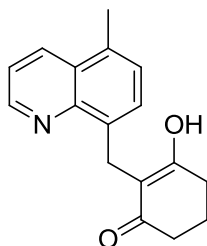

The title compound **3b** was isolated (PE:EA = 5:1) as a light brown solid, yield: 95%;  $^1\text{H}$  NMR (400 MHz,  $\text{CDCl}_3$ )  $\delta$  14.04 (s, 1H), 8.83 (dd,  $J$  = 4.4, 1.6 Hz, 1H), 8.43 (dd,  $J$  = 8.4, 1.6 Hz, 1H), 7.95 (d,  $J$  = 7.2 Hz, 1H), 7.51 (dd,  $J$  = 8.4, 4.4 Hz, 1H), 7.35 (dd,  $J$  = 7.2, 0.8 Hz, 1H), 4.04 (s, 2H), 2.64 (s, 3H), 2.40 (t,  $J$  = 5.6 Hz, 2H), 2.28 (t,  $J$  = 5.6 Hz, 2H), 1.90 (p,  $J$  = 6.4 Hz, 2H);  $^{13}\text{C}$  NMR (100 MHz,  $\text{CDCl}_3$ )  $\delta$  198.3, 174.3, 146.9, 145.2, 136.8, 134.8, 132.6, 132.0, 128.0, 120.4, 114.9, 36.9, 29.9, 25.2, 20.7, 18.4; HRMS (ESI): Calcd for  $\text{C}_{17}\text{H}_{18}\text{NO}_2$   $[\text{M}+\text{H}]^+$  268.1332, Found: 268.1327.

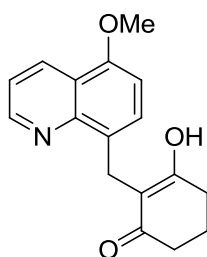

The title compound **3c** was isolated (PE:EA = 5:1) as a light brown solid, yield: 97%;  $^1\text{H}$  NMR (400 MHz,  $\text{CDCl}_3$ )  $\delta$  13.95 (s, 1H), 8.82 (dd,  $J$  = 4.4, 1.6 Hz, 1H), 8.68 (dd,  $J$  = 8.4, 1.6 Hz, 1H), 7.95 (d,  $J$  = 8.0 Hz, 1H), 7.45 (dd,  $J$  = 8.4, 4.4 Hz, 1H), 6.83 (d,  $J$  = 8.0 Hz, 1H), 3.97 (s, 5H), 2.41 (t,  $J$  = 6.0 Hz, 2H), 2.28 (t,  $J$  = 6.0 Hz, 2H), 1.90 (p,  $J$  = 6.4 Hz, 2H);  $^{13}\text{C}$  NMR (125 MHz,  $\text{CDCl}_3$ )  $\delta$  198.4, 174.2, 153.5, 147.7, 145.3, 133.2, 132.1, 130.5, 121.3, 119.8, 115.2, 105.0, 55.8, 36.9, 29.9, 24.7, 20.7; HRMS (ESI): Calcd for  $\text{C}_{17}\text{H}_{18}\text{NO}_3$   $[\text{M}+\text{H}]^+$  284.1281, Found: 284.1275.

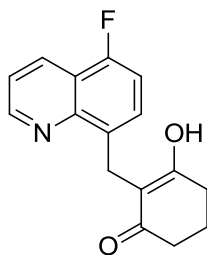

The title compound **3d** was isolated (PE:EA = 5:1) as a light brown solid, yield: 95%;

$^1\text{H}$  NMR (400 MHz,  $\text{CDCl}_3$ )  $\delta$  13.33 (s, 1H), 8.89 (dd,  $J = 4.4, 1.2$  Hz, 1H), 8.79 – 8.33 (m, 1H), 8.00 (dd,  $J = 8.0, 6.4$  Hz, 1H), 7.55 (dd,  $J = 8.4, 4.4$  Hz, 1H), 7.24 – 7.12 (m, 1H), 4.02 (s, 2H), 2.42 (t,  $J = 6.0$  Hz, 2H), 2.28 (t,  $J = 6.4$  Hz, 2H), 1.90 (p,  $J = 6.4$  Hz, 2H);  $^{13}\text{C}$  NMR (100 MHz,  $\text{CDCl}_3$ )  $\delta$  198.4, 174.0, 156.1 (d,  $J = 253.7$  Hz), 148.5, 145.1 (d,  $J = 2.8$  Hz), 134.7 (d,  $J = 4.6$  Hz), 131.7 (d,  $J = 13.7$  Hz), 131.7, 120.8 (d,  $J = 2.2$  Hz), 119.4 (d,  $J = 17.3$  Hz), 114.7, 110.9 (d,  $J = 18.5$  Hz), 36.8, 29.8, 24.7, 20.6; HRMS (ESI): Calcd for  $\text{C}_{16}\text{H}_{15}\text{FNO}_2$   $[\text{M}+\text{H}]^+$  272.1081, Found: 272.1072.

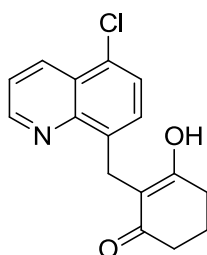

The title compound **3e** was isolated (PE:EA = 5:1) as a light brown solid, yield: 96%;  $^1\text{H}$  NMR (400 MHz,  $\text{CDCl}_3$ )  $\delta$  13.34 (s, 1H), 8.89 (dd,  $J = 4.4, 1.6$  Hz, 1H), 8.68 (dd,  $J = 8.4, 1.6$  Hz, 1H), 8.00 (d,  $J = 7.6$  Hz, 1H), 7.65 – 7.51 (m, 2H), 4.04 (s, 2H), 2.41 (t,  $J = 6.4$  Hz, 2H), 2.28 (t,  $J = 6.4$  Hz, 2H), 1.98 – 1.83 (p,  $J = 6.4$  Hz, 2H);  $^{13}\text{C}$  NMR (125 MHz,  $\text{CDCl}_3$ )  $\delta$  198.3, 174.1, 148.2, 145.6, 138.2, 135.2, 132.1, 129.2, 127.5, 126.6, 121.6, 114.4, 36.8, 29.8, 25.0, 20.6; HRMS (ESI): Calcd for  $\text{C}_{16}\text{H}_{15}\text{ClNO}_2$   $[\text{M}+\text{H}]^+$  288.0785, Found: 288.0772.

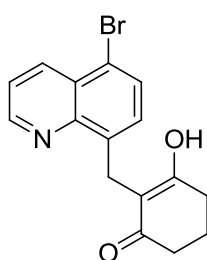

The title compound **3f** was isolated (PE:EA = 5:1) as a light brown solid, yield: 94%;  $^1\text{H}$  NMR (400 MHz,  $\text{CDCl}_3$ )  $\delta$  13.30 (s, 1H), 8.86 (dd,  $J = 4.4, 1.6$  Hz, 1H), 8.65 (dd,  $J = 8.4, 1.6$  Hz, 1H), 7.94 (d,  $J = 8.0$  Hz, 1H), 7.78 (d,  $J = 8.0$  Hz, 1H), 7.59 (dd,  $J = 8.4, 4.4$  Hz, 1H), 4.03 (s, 2H), 2.41 (s, 2H), 2.29 (s, 2H), 1.90 (p,  $J = 6.4$  Hz, 2H);  $^{13}\text{C}$  NMR (125 MHz,  $\text{CDCl}_3$ )  $\delta$  198.2, 174.1, 148.3, 145.8, 138.9, 137.9, 132.6, 131.3, 127.9, 121.9, 119.5, 114.3, 36.8, 29.7, 25.0, 20.6; HRMS (ESI): Calcd for

C<sub>16</sub>H<sub>15</sub>BrNO<sub>2</sub> [M+H]<sup>+</sup> 332.0281, Found: 332.0277.

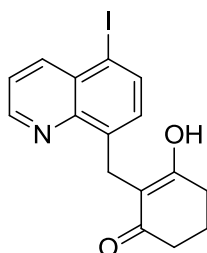

The title compound **3g** was isolated (PE:EA = 5:1) as a light brown solid, yield: 95%; <sup>1</sup>H NMR (400 MHz, CDCl<sub>3</sub>) δ 13.34 (s, 1H), 8.82 (d, *J* = 4.4 Hz, 1H), 8.49 (d, *J* = 8.4 Hz, 1H), 8.07 (d, *J* = 7.6 Hz, 1H), 7.80 (d, *J* = 7.6 Hz, 1H), 7.55 (dd, *J* = 8.4, 4.4 Hz, 1H), 4.03 (s, 2H), 2.41 (t, *J* = 6.4 Hz, 2H), 2.28 (t, *J* = 6.4 Hz, 2H), 1.97 – 1.84 (p, *J* = 6.4 Hz, 2H); <sup>13</sup>C NMR (125 MHz, CDCl<sub>3</sub>) δ 198.2, 174.2, 148.4, 145.7, 142.7, 140.0, 138.7, 133.4, 130.2, 122.4, 114.2, 95.6, 36.8, 29.7, 25.0, 20.6; HRMS (ESI): Calcd for C<sub>16</sub>H<sub>15</sub>INO<sub>2</sub> [M+H]<sup>+</sup> 380.0141, Found: 380.0135.

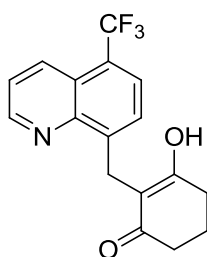

The title compound **3h** was isolated (PE:EA = 5:1) as a light brown solid, yield: 93%; <sup>1</sup>H NMR (400 MHz, CDCl<sub>3</sub>) δ 13.27 (s, 1H), 8.95 (dd, *J* = 4.4, 1.6 Hz, 1H), 8.74 – 8.57 (m, 1H), 8.15 (d, *J* = 7.6 Hz, 1H), 7.90 (d, *J* = 7.6 Hz, 1H), 7.64 (dd, *J* = 8.8, 4.4 Hz, 1H), 4.12 (s, 2H), 2.43 (t, *J* = 6.4 Hz, 2H), 2.30 (t, *J* = 6.4 Hz, 2H), 1.92 (p, *J* = 6.4 Hz, 2H); <sup>13</sup>C NMR (150 MHz, CDCl<sub>3</sub>) δ 198.2, 174.4, 148.3, 145.2, 143.9, 135.0, 130.8, 126.2(q, *J* = 5.7 Hz), 124.8, 124.5, 124.1, 124.0 (q, *J* = 273.5 Hz), 122.1, 113.9, 36.8, 29.8, 25.6, 20.6; HRMS (ESI): Calcd for C<sub>17</sub>H<sub>15</sub>F<sub>3</sub>NO<sub>2</sub> [M+H]<sup>+</sup> 322.1050, Found: 322.1041.

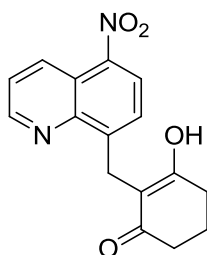

The title compound **3i** was isolated (PE:EA = 2:1) as a light brown solid, yield: 92%;  $^1\text{H}$  NMR (400 MHz,  $\text{CDCl}_3$ )  $\delta$  12.86 (s, 1H), 9.19 (dd,  $J$  = 8.8, 1.6 Hz, 1H), 8.98 (dd,  $J$  = 4.4, 1.6 Hz, 1H), 8.36 (d,  $J$  = 8.0 Hz, 1H), 8.21 (d,  $J$  = 8.0 Hz, 1H), 7.75 (dd,  $J$  = 8.8, 4.4 Hz, 1H), 4.15 (s, 2H), 2.43 (t,  $J$  = 6.4 Hz, 2H), 2.30 (t,  $J$  = 6.4 Hz, 2H), 1.98 – 1.82 (p,  $J$  = 6.4 Hz, 2H);  $^{13}\text{C}$  NMR (126 MHz,  $\text{CDCl}_3$ )  $\delta$  198.1, 174.4, 148.9, 146.9, 144.8, 143.6, 134.6, 130.6, 125.8, 123.7, 121.7, 113.3, 36.8, 29.6, 25.9, 20.6; HRMS (ESI): Calcd for  $\text{C}_{16}\text{H}_{15}\text{N}_2\text{O}_4$   $[\text{M}+\text{H}]^+$  299.1026, Found: 299.1031.

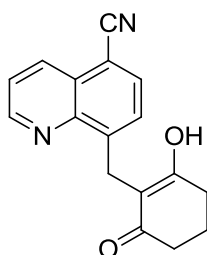

The title compound **3j** was isolated (PE:EA = 2:1) as a light brown solid, yield: 70%;  $^1\text{H}$  NMR (400 MHz,  $\text{CDCl}_3$ )  $\delta$  12.93 (s, 1H), 8.99 (dd,  $J$  = 4.4, 1.6 Hz, 1H), 8.66 (dd,  $J$  = 8.4, 1.6 Hz, 1H), 8.18 (d,  $J$  = 7.6 Hz, 1H), 7.96 (d,  $J$  = 7.6 Hz, 1H), 7.72 (dd,  $J$  = 8.4, 4.4 Hz, 1H), 4.13 (s, 2H), 2.43 (t,  $J$  = 6.4 Hz, 2H), 2.29 (t,  $J$  = 6.4 Hz, 2H), 1.92 (p,  $J$  = 6.4 Hz, 2H);  $^{13}\text{C}$  NMR (126 MHz,  $\text{CDCl}_3$ )  $\delta$  198.2, 174.4, 149.4, 145.4, 144.6, 135.8, 134.0, 131.7, 128.2, 123.1, 116.6, 113.5, 108.3, 36.8, 29.8, 25.6, 20.6; HRMS (ESI): Calcd for  $\text{C}_{17}\text{H}_{15}\text{N}_2\text{O}_2$   $[\text{M}+\text{H}]^+$  279.1128, Found: 279.1133.

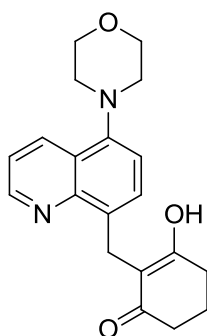

The title compound **3k** was isolated (PE:EA = 2:1) as a light brown solid, yield: 98%;  $^1\text{H}$  NMR (400 MHz,  $\text{CDCl}_3$ )  $\delta$  13.96 (s, 1H), 8.82 (dd,  $J$  = 4.4, 1.6 Hz, 1H), 8.65 (dd,  $J$  = 8.4, 1.6 Hz, 1H), 7.98 (d,  $J$  = 7.6 Hz, 1H), 7.47 (dd,  $J$  = 8.4, 4.4 Hz, 1H), 7.13 (d,  $J$  = 7.6 Hz, 1H), 4.00 (s, 2H), 3.98 – 3.89 (m, 4H), 3.11 – 2.96 (m, 4H), 2.41 (s, 2H), 2.28 (s, 2H), 1.95 – 1.83 (p,  $J$  = 6.4 Hz, 2H);  $^{13}\text{C}$  NMR (100 MHz,  $\text{CDCl}_3$ )  $\delta$  198.4,

174.3, 147.8, 147.3, 145.8, 134.3, 134.2, 132.2, 124.5, 120.0, 116.4, 114.9, 67.2, 53.6, 36.8, 29.9, 25.0, 20.7; HRMS (ESI): Calcd for C<sub>20</sub>H<sub>23</sub>N<sub>2</sub>O<sub>3</sub> [M+H]<sup>+</sup> 339.1703, Found: 339.1693.

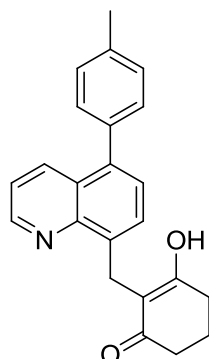

The title compound **3l** was isolated (PE:EA = 5:1) as a light brown solid, yield: 94%; <sup>1</sup>H NMR (400 MHz, CDCl<sub>3</sub>) δ 14.06 (s, 1H), 8.84 (dd, *J* = 4.4, 1.6 Hz, 1H), 8.38 (dd, *J* = 8.4, 1.6 Hz, 1H), 8.11 (d, *J* = 7.2 Hz, 1H), 7.48 (d, *J* = 7.2 Hz, 1H), 7.43 (dd, *J* = 8.4, 4.4 Hz, 1H), 7.30 (s, 4H), 4.12 (s, 2H), 2.45 (s, 5H), 2.32 (s, 2H), 1.93 (p, *J* = 6.4 Hz, 2H); <sup>13</sup>C NMR (125 MHz, CDCl<sub>3</sub>) δ 198.3, 174.4, 147.2, 145.1, 138.7, 138.0, 137.5, 136.9, 136.0, 131.9, 129.9, 129.2, 128.2, 127.2, 120.6, 114.8, 36.9, 29.9, 25.4, 21.2, 20.7; HRMS (ESI): Calcd for C<sub>23</sub>H<sub>22</sub>NO<sub>2</sub> [M+H]<sup>+</sup> 344.1645, Found: 344.1641.

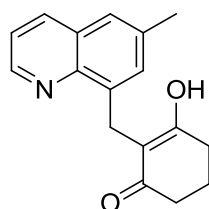

The title compound **3m** was isolated (PE:EA = 5:1) as a light brown solid, yield: 96%; <sup>1</sup>H NMR (400 MHz, CDCl<sub>3</sub>) δ 14.15 (s, 1H), 8.75 (dd, *J* = 4.4, 1.6 Hz, 1H), 8.15 (dd, *J* = 8.4, 1.6 Hz, 1H), 7.90 (d, *J* = 2.0 Hz, 1H), 7.44 – 7.41 (m, 2H), 4.03 (s, 2H), 2.50 (s, 3H), 2.42 (s, 2H), 2.29 (s, 2H), 1.90 (p, *J* = 6.4 Hz, 2H); <sup>13</sup>C NMR (125 MHz, CDCl<sub>3</sub>) δ 198.3, 174.5, 146.5, 143.6, 138.5, 137.8, 137.6, 134.6, 128.8, 124.7, 120.8, 114.7, 36.9, 30.0, 25.2, 21.6, 20.7; HRMS (ESI): Calcd for C<sub>17</sub>H<sub>18</sub>NO<sub>2</sub> [M+H]<sup>+</sup> 268.1332, Found: 268.1321.



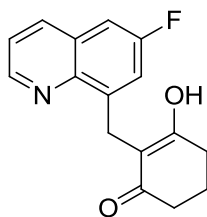

The title compound **3n** was isolated (PE:EA = 5:1) as a light brown solid, yield: 95%;  $^1\text{H}$  NMR (400 MHz,  $\text{CDCl}_3$ )  $\delta$  13.57 (s, 1H), 8.80 (dd,  $J = 4.4, 1.6$  Hz, 1H), 8.20 (dd,  $J = 8.4, 1.6$  Hz, 1H), 7.87 (dd,  $J = 9.2, 2.8$  Hz, 1H), 7.50 (dd,  $J = 8.4, 4.4$  Hz, 1H), 7.30 (dd,  $J = 8.4, 2.8$  Hz, 1H), 4.06 (s, 2H), 2.42 (t,  $J = 6.4$  Hz, 2H), 2.30 (t,  $J = 6.4$  Hz, 2H), 2.00 – 1.82 (p,  $J = 6.4$  Hz, 2H);  $^{13}\text{C}$  NMR (125 MHz,  $\text{CDCl}_3$ )  $\delta$  198.1, 174.3, 160.7 (d,  $J = 250.5$  Hz), 146.8, 142.3 (d,  $J = 8.5$  Hz), 137.7 (d,  $J = 5.2$  Hz), 129.5 (d,  $J = 10.1$  Hz), 122.5 (d,  $J = 25.9$  Hz), 121.6, 114.0, 108.8 (d,  $J = 21.9$  Hz), 36.79, 29.84, 25.30, 20.63; HRMS (ESI): Calcd for  $\text{C}_{16}\text{H}_{15}\text{FNO}_2$   $[\text{M}+\text{H}]^+$  272.1081, Found: 272.1077.

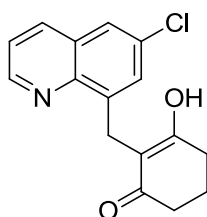

The title compound **3o** was isolated (PE:EA = 5:1) as a light brown solid, yield: 97%;  $^1\text{H}$  NMR (400 MHz,  $\text{CDCl}_3$ )  $\delta$  13.47 (s, 1H), 8.82 (dd,  $J = 4.4, 1.6$  Hz, 1H), 8.16 (dd,  $J = 8.4, 1.2$  Hz, 1H), 8.03 (d,  $J = 2.4$  Hz, 1H), 7.67 (d,  $J = 2.0$  Hz, 1H), 7.51 (dd,  $J = 8.4, 4.4$  Hz, 1H), 4.03 (s, 2H), 2.42 (t,  $J = 6.4$  Hz, 2H), 2.30 (t,  $J = 6.4$  Hz, 2H), 2.10 – 1.80 (p,  $J = 6.4$  Hz, 2H);  $^{13}\text{C}$  NMR (125 MHz,  $\text{CDCl}_3$ )  $\delta$  198.1, 174.2, 147.7, 143.6, 141.0, 137.4, 133.4, 133.0, 129.2, 124.5, 121.7, 114.0, 36.8, 29.8, 25.1, 20.6. HRMS (ESI): Calcd for  $\text{C}_{16}\text{H}_{15}\text{ClNO}_2$   $[\text{M}+\text{H}]^+$  288.0785, Found: 288.0773.

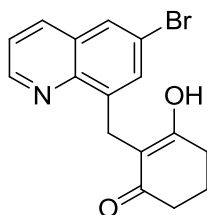

The title compound **3p** was isolated (PE:EA = 5:1) as a light brown solid, yield: 97%;  $^1\text{H}$  NMR (400 MHz,  $\text{CDCl}_3$ )  $\delta$  13.46 (s, 1H), 8.84 (dd,  $J = 4.4, 1.6$  Hz, 1H), 8.41 –

8.06 (m, 2H), 7.85 (d,  $J = 2.0$  Hz, 1H), 7.50 (dd,  $J = 8.4, 4.4$  Hz, 1H), 4.02 (s, 2H), 2.42 (t,  $J = 6.4$  Hz, 2H), 2.30 (t,  $J = 6.4$  Hz, 2H), 1.99 – 1.84 (p,  $J = 6.4$  Hz, 2H);  $^{13}\text{C}$  NMR (125 MHz,  $\text{CDCl}_3$ )  $\delta$  198.0, 174.2, 147.9, 143.8, 141.0, 137.3, 135.4, 129.7, 127.9, 121.7, 114.0, 36.8, 29.8, 25.0, 20.6; HRMS (ESI): Calcd for  $\text{C}_{16}\text{H}_{15}\text{BrNO}_2$   $[\text{M}+\text{H}]^+$  332.0281, Found: 332.0276.

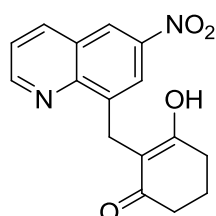

The title compound **3q** was isolated (PE:EA = 2:1) as a light brown solid, yield: 90%;  $^1\text{H}$  NMR (400 MHz,  $\text{CDCl}_3$ )  $\delta$  12.83 (s, 1H), 9.04 (dd,  $J = 4.4, 1.6$  Hz, 1H), 8.84 (d,  $J = 2.4$  Hz, 1H), 8.66 (d,  $J = 2.4$  Hz, 1H), 8.47 (dd,  $J = 8.4, 1.6$  Hz, 1H), 7.68 (dd,  $J = 8.4, 4.4$  Hz, 1H), 4.16 (s, 2H), 2.43 (t,  $J = 6.4$  Hz, 2H), 2.30 (t,  $J = 6.4$  Hz, 2H), 1.92 (p,  $J = 6.4$  Hz, 2H);  $^{13}\text{C}$  NMR (125 MHz,  $\text{CDCl}_3$ )  $\delta$  198.1, 174.0, 151.1, 147.1, 146.0, 141.8, 140.3, 127.6, 125.4, 122.7, 122.3, 113.7, 36.7, 29.7, 25.5, 20.5; HRMS (ESI): Calcd for  $\text{C}_{16}\text{H}_{15}\text{N}_2\text{O}_4$   $[\text{M}+\text{H}]^+$  299.1026, Found: 299.1033.

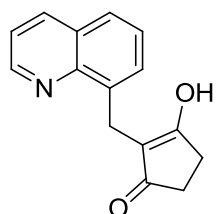

The title compound **3r** was isolated (PE:EA = 5:1) as a light brown solid, yield: 96%;  $^1\text{H}$  NMR (400 MHz,  $\text{CDCl}_3$ )  $\delta$  8.89 (dd,  $J = 4.4, 1.6$  Hz, 1H), 8.29 (dd,  $J = 8.4, 1.6$  Hz, 1H), 7.88 (dd,  $J = 7.2, 1.2$  Hz, 1H), 7.73 (dd,  $J = 8.4, 1.2$  Hz, 1H), 7.59 – 7.47 (m, 2H), 3.93 (s, 2H), 2.46 (s, 2H), 2.41 (s, 2H);  $^{13}\text{C}$  NMR (100 MHz,  $\text{CDCl}_3$ )  $\delta$  204.8, 186.9, 148.1, 145.1, 138.7, 138.0, 131.7, 129.0, 127.7, 126.5, 121.0, 116.8, 33.7, 27.1, 24.5; HRMS (ESI): Calcd for  $\text{C}_{15}\text{H}_{14}\text{NO}_2$   $[\text{M}+\text{H}]^+$  240.1020, Found: 240.1017.

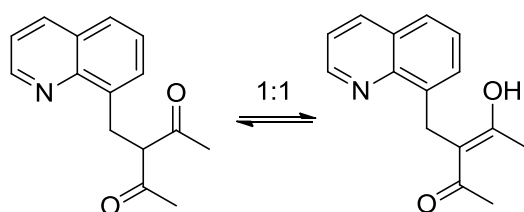

The title compound **3s** was isolated (PE:EA = 5:1) as a light brown solid, yield: 95%;  $^1\text{H}$  NMR (400 MHz,  $\text{CDCl}_3$ )  $\delta$  16.93 and 4.50 (s, t,  $J = 7.2$  Hz, 1H), 8.97 and 8.91 (a pair of dd,  $J = 4.0, 1.6$  Hz, 1H), 8.19 and 8.14 (a pair of dd,  $J = 8.0, 1.6$  Hz, 1H), 7.60 – 7.33 (m, 3H), 4.33 and 3.75 (s, d,  $J = 7.2$  Hz, 2H), 2.17 (s, 3H), 2.06 (s, 3H);  $^{13}\text{C}$  NMR (125 MHz,  $\text{CDCl}_3$ )  $\delta$  204.5, 192.3, 149.5, 149.4, 146.7, 146.6, 138.0, 136.8, 136.5, 136.4, 130.3, 128.4, 128.4, 127.4, 126.7, 126.4, 126.4, 126.3, 121.21, 121.1, 107.6, 68.4, 30.6, 29.8, 28.4, 23.1; HRMS (ESI): Calcd for  $\text{C}_{15}\text{H}_{16}\text{NO}_2$   $[\text{M}+\text{H}]^+$  242.1176, Found: 242.1168.

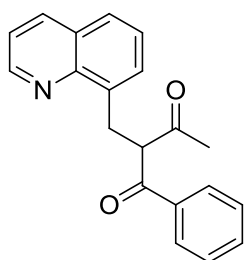

The title compound **3t** was isolated (PE:EA = 5:1) as a light brown solid, yield: 80%;  $^1\text{H}$  NMR (400 MHz,  $\text{CDCl}_3$ )  $\delta$  8.96 (dd,  $J = 4.0, 1.6$  Hz, 1H), 8.13 (dd,  $J = 8.4, 1.6$  Hz, 1H), 8.04 (dd,  $J = 5.2, 3.2$  Hz, 2H), 7.66 (dd,  $J = 8.0, 1.2$  Hz, 1H), 7.61 (d,  $J = 6.4$  Hz, 1H), 7.52 (t,  $J = 7.2$  Hz, 1H), 7.45 – 7.35 (m, 4H), 5.42 (t,  $J = 7.2$  Hz, 1H), 3.88 (qd,  $J = 13.2, 7.2$  Hz, 2H), 2.16 (s, 3H);  $^{13}\text{C}$  NMR (125 MHz,  $\text{CDCl}_3$ )  $\delta$  204.0, 197.0, 149.3, 146.8, 136.9, 136.6, 136.4, 133.4, 130.9, 128.9, 128.6, 128.4, 127.0, 126.3, 121.0, 62.8, 31.9, 29.2; HRMS (ESI): Calcd for  $\text{C}_{20}\text{H}_{18}\text{NO}_2$   $[\text{M}+\text{H}]^+$  304.1332, Found: 304.1337.

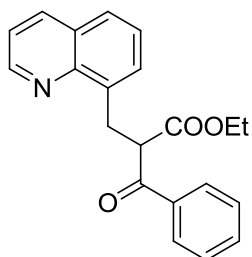

The title compound **3u** was isolated (PE:EA = 5:1) as a light brown solid, yield: 60%;  $^1\text{H}$  NMR (400 MHz,  $\text{CDCl}_3$ )  $\delta$  8.97 (dd,  $J = 4.0, 1.6$  Hz, 1H), 8.19 – 8.16 (m, 2H), 8.14 (dd,  $J = 8.4, 1.6$  Hz, 1H), 7.69 – 7.65 (m, 2H), 7.54 (t,  $J = 7.2$  Hz, 1H), 7.45 – 7.39 (m, 4H), 5.30 (dd,  $J = 9.2, 5.6$  Hz, 1H), 4.17 – 3.92 (m, 3H), 3.76 (dd,  $J = 13.2,$

9.2 Hz, 1H), 1.07 (t,  $J = 7.2$  Hz, 3H);  $^{13}\text{C}$  NMR (125 MHz,  $\text{CDCl}_3$ )  $\delta$  196.0, 169.8, 149.3, 146.9, 136.7, 136.4, 136.2, 133.3, 131.0, 129.0, 128.5, 128.3, 127.0, 126.3, 121.0, 61.1, 54.9, 32.3, 13.9; HRMS (ESI): Calcd for  $\text{C}_{21}\text{H}_{20}\text{NO}_3$   $[\text{M}+\text{H}]^+$  334.1437, Found: 334.1430.

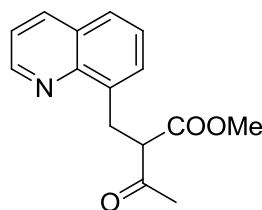

The title compound **3v** was isolated (PE:EA = 5:1) as a light brown oil, yield: 77%;  $^1\text{H}$  NMR (400 MHz,  $\text{CDCl}_3$ )  $\delta$  8.91 (dd,  $J = 4.0, 1.6$  Hz, 1H), 8.13 (dd,  $J = 8.4, 1.6$  Hz, 1H), 7.70 (dd,  $J = 8.4, 1.6$  Hz, 1H), 7.64 – 7.53 (m, 1H), 7.41 (ddd,  $J = 8.4, 7.6, 5.6$  Hz, 2H), 4.38 (dd,  $J = 8.4, 6.6$  Hz, 1H), 3.87 (dd,  $J = 13.6, 6.6$  Hz, 1H), 3.70 – 3.58 (m, 4H), 2.22 (s, 3H);  $^{13}\text{C}$  NMR (125 MHz,  $\text{CDCl}_3$ )  $\delta$  203.3, 170.0, 149.5, 146.7, 136.6, 136.3, 130.4, 128.4, 127.1, 126.2, 121.0, 59.9, 52.2, 30.9, 29.5; HRMS (ESI): Calcd for  $\text{C}_{15}\text{H}_{16}\text{NO}_3$   $[\text{M}+\text{H}]^+$  258.1124, Found: 258.1119.

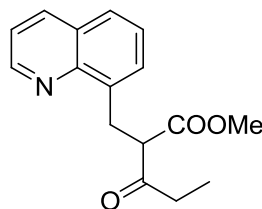

The title compound **3w** was isolated (PE:EA = 5:1) as a light brown oil, yield: 80%;  $^1\text{H}$  NMR (400 MHz,  $\text{CDCl}_3$ )  $\delta$  8.91 (dd,  $J = 4.0, 1.6$  Hz, 1H), 8.13 (dd,  $J = 8.4, 1.6$  Hz, 1H), 7.69 (dd,  $J = 8.0, 1.2$  Hz, 1H), 7.56 (dd,  $J = 7.2, 1.2$  Hz, 1H), 7.47 – 7.35 (m, 2H), 4.40 (dd,  $J = 8.0, 6.8$  Hz, 1H), 3.85 – 3.77 (m, 1H), 3.68 (dd,  $J = 13.2, 8.0$  Hz, 1H), 3.64 (s, 3H), 2.58 (dq,  $J = 18.4, 7.2$  Hz, 1H), 2.38 (dq,  $J = 18.4, 7.2$  Hz, 1H), 0.97 (t,  $J = 7.2$  Hz, 3H);  $^{13}\text{C}$  NMR (150 MHz,  $\text{CDCl}_3$ )  $\delta$  206.2, 170.1, 149.4, 146.7, 136.6, 136.3, 130.5, 128.3, 127.0, 126.2, 121.0, 58.7, 52.2, 36.0, 31.0, 7.4; HRMS (ESI): Calcd for  $\text{C}_{16}\text{H}_{18}\text{NO}_3$   $[\text{M}+\text{H}]^+$  272.1281, Found: 272.1275.

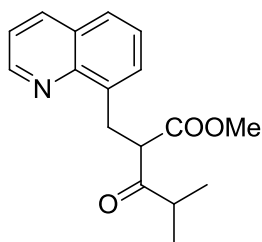

The title compound **3x** was isolated (PE:EA = 5:1) as a light brown oil, yield: 95%;  $^1\text{H}$  NMR (400 MHz,  $\text{CDCl}_3$ )  $\delta$  8.92 (dd,  $J$  = 4.0, 1.6 Hz, 1H), 8.13 (dd,  $J$  = 8.4, 1.6 Hz, 1H), 7.69 (dd,  $J$  = 8.0, 1.2 Hz, 1H), 7.56 (d,  $J$  = 6.0 Hz, 1H), 7.48 – 7.35 (m, 2H), 4.59 (t,  $J$  = 7.2 Hz, 1H), 3.73 (d,  $J$  = 7.2 Hz, 2H), 3.64 (s, 3H), 2.65 (hept,  $J$  = 6.8 Hz, 1H), 1.03 (d,  $J$  = 6.8 Hz, 3H), 0.79 (d,  $J$  = 6.8 Hz, 3H);  $^{13}\text{C}$  NMR (150 MHz,  $\text{CDCl}_3$ )  $\delta$  209.5, 170.0, 149.4, 146.7, 136.7, 136.4, 130.8, 128.3, 127.0, 126.2, 121.0, 56.8, 52.1, 41.2, 31.4, 17.8, 17.4; HRMS (ESI): Calcd for  $\text{C}_{17}\text{H}_{20}\text{NO}_3$   $[\text{M}+\text{H}]^+$  268.1438, Found: 268.1430.

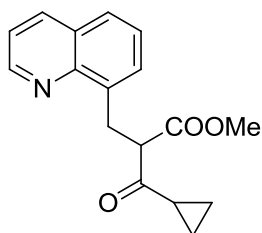

The title compound **3y** was isolated (PE:EA = 5:1) as a light brown oil, yield: 74%;  $^1\text{H}$  NMR (400 MHz,  $\text{CDCl}_3$ )  $\delta$  8.92 (dd,  $J$  = 4.0, 1.6 Hz, 1H), 8.14 (dd,  $J$  = 8.4, 1.6 Hz, 1H), 7.70 (dd,  $J$  = 8.0, 1.2 Hz, 1H), 7.59 (d,  $J$  = 7.2 Hz, 1H), 7.48 – 7.37 (m, 2H), 4.52 (dd,  $J$  = 8.4, 6.4 Hz, 1H), 3.91 (dd,  $J$  = 13.2, 6.4 Hz, 1H), 3.69 (dd,  $J$  = 13.2, 8.4 Hz, 1H), 3.65 (s, 3H), 2.15 – 2.09 (m, 1H), 1.11 – 1.05 (m, 1H), 1.03 – 0.97 (m, 1H), 0.92 – 0.79 (m, 2H);  $^{13}\text{C}$  NMR (125 MHz,  $\text{CDCl}_3$ )  $\delta$  205.6, 170.2, 149.4, 146.8, 136.7, 136.3, 130.5, 128.4, 127.0, 126.2, 121.0, 59.8, 52.2, 31.1, 20.3, 11.6, 11.5; HRMS (ESI): Calcd for  $\text{C}_{17}\text{H}_{18}\text{NO}_3$   $[\text{M}+\text{H}]^+$  284.1282, Found: 284.1276.

**b) General procedure of hydrogenation of compounds **3a**, **3v**:**

A solution of **3a** (24mg, 0.1mmol) and  $\text{PtO}_2$  (1mg, 5 mol %) in 1.5mL methanol was stirred at 40°C for 4 hours under a  $\text{H}_2$  atmosphere. The mixture was filtered through Celite and the filtrate was concentrated under reduced pressure. The residue was purified by silica gel column chromatography to afford **3a'**.

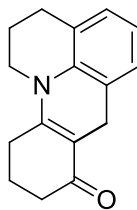

Compound **3a**: 90% yield.  $^1\text{H}$  NMR (400 MHz,  $\text{CDCl}_3$ )  $\delta$  6.96 – 6.93 (m, 1H), 6.90 – 6.84 (m, 2H), 3.72 – 3.69 (m, 2H), 3.64 (s, 2H), 2.82 – 2.71 (m, 2H), 2.60 (t,  $J = 6.4$  Hz, 2H), 2.42 – 2.31 (m, 2H), 2.09 – 1.96 (m, 4H);  $^{13}\text{C}$  NMR (125 MHz,  $\text{CDCl}_3$ )  $\delta$  195.1, 155.7, 135.9, 127.3, 127.0, 124.7, 123.8, 122.7, 106.5, 45.7, 35.8, 27.6, 26.3, 24.4, 22.2, 21.6; HRMS (ESI): Calcd for  $\text{C}_{16}\text{H}_{18}\text{NO}$ :  $[\text{M}+\text{H}]^+$  240.1382, sFound:  $m/z$  240.1379.

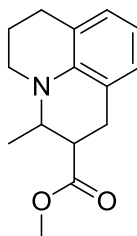

Compound **3v**: 93% yield.  $^1\text{H}$  NMR (400 MHz,  $\text{CDCl}_3$ )  $\delta$  6.87 (d,  $J = 7.2$  Hz, 1H), 6.81 (d,  $J = 7.2$  Hz, 1H), 6.52 (t,  $J = 7.2$  Hz, 1H), 3.79 – 3.68 (m, 4H), 3.39 – 3.29 (m, 1H), 3.21 – 2.99 (m, 3H), 2.90 – 2.69 (m, 3H), 2.05 – 1.91 (m, 2H), 1.01 (d,  $J = 6.4$  Hz, 3H);  $^{13}\text{C}$  NMR (125 MHz,  $\text{CDCl}_3$ )  $\delta$  173.7, 140.4, 127.3, 121.7, 118.7, 115.5, 54.0, 51.8, 48.2, 42.1, 27.9, 24.9, 22.0, 11.9; HRMS (ESI): Calcd for  $\text{C}_{15}\text{H}_{20}\text{NO}_2$   $[\text{M}+\text{H}]^+$  246.1490, Found:  $m/z$  246.1488.

### c) Mechanistic study

#### (1) Hydrogen-deuterium exchange experiment

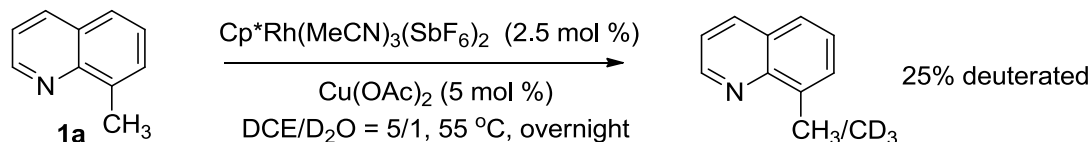

$\text{Cp}^*\text{Rh}(\text{MeCN})_3(\text{SbF}_6)_2$  (2.5 mol %),  $\text{Cu}(\text{OAc})_2$  (5 mol %), 8-methylquinoline **1a** (0.2 mmol) and  $\text{DCE}:\text{D}_2\text{O}$  (2 mL, 5:1) were added to a test tube. The reaction mixture was stirred at 55 °C overnight. The solution was filtered through a celite pad and washed with dichloromethane. Then, the solvent was removed under reduced pressure and the

residue was purified by silica gel chromatography using PE/EA to provide **1a-dn**.  $^1\text{H}$  NMR analysis showed that 25% hydrogen at the C8-position methyl of quinolone was deuterated.

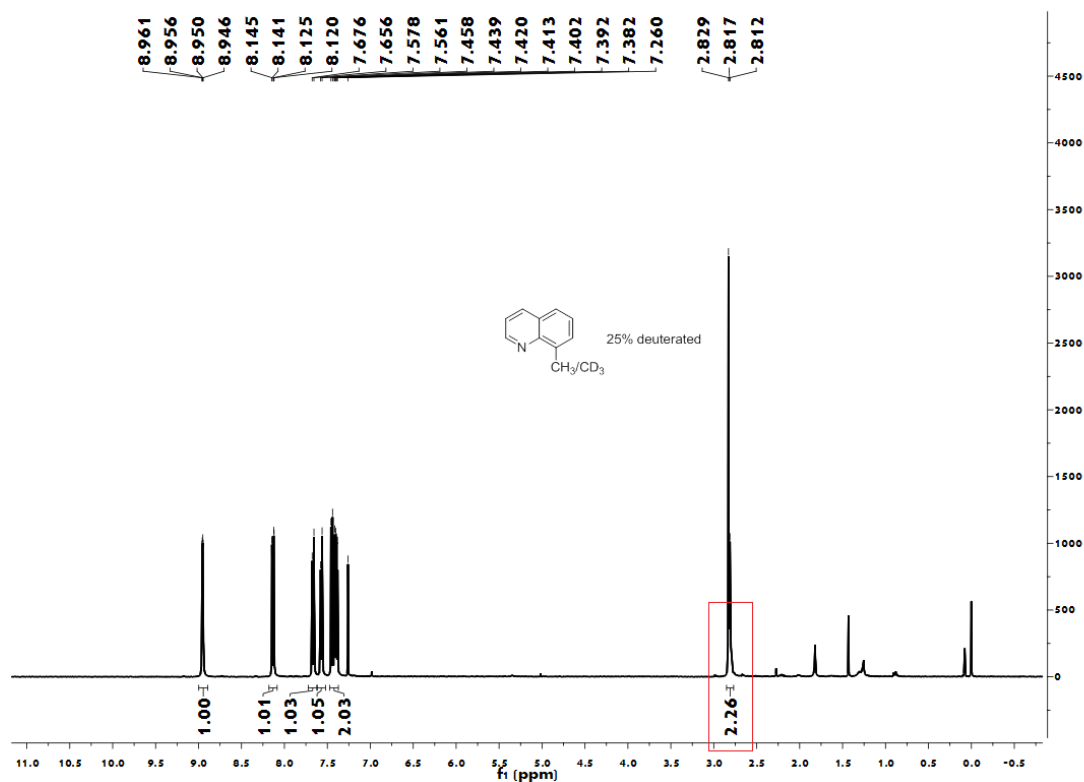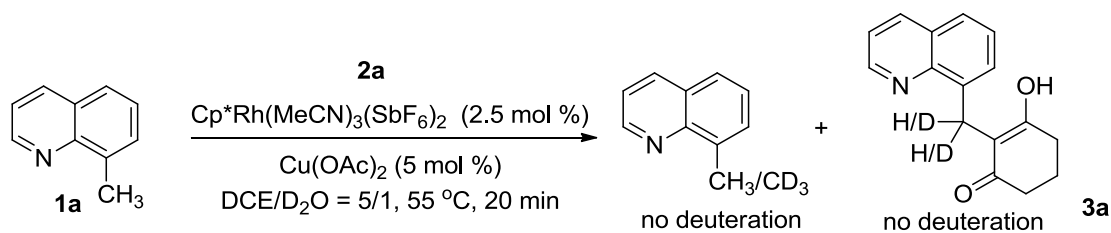

$\text{Cp}^*\text{Rh}(\text{MeCN})_3(\text{SbF}_6)_2$  (2.5 mol %),  $\text{Cu}(\text{OAc})_2$  (5 mol %), 8-methylquinoline **1a** (0.2 mmol), diazo compound **2a** (0.3 mmol) and  $\text{DCE}:\text{D}_2\text{O}$  (2 mL, 5:1) were added to a test tube. The reaction mixture was stirred at 55 °C for 20 min. The solution was filtered through a celite pad and washed with dichloromethane. Then, the solvent was removed under reduced pressure and the residue was purified by silica gel chromatography using PE/EA to provide **1a-dn** and **3a-dn**. No deuteration was observed at the C8-position methyl of quinolone.

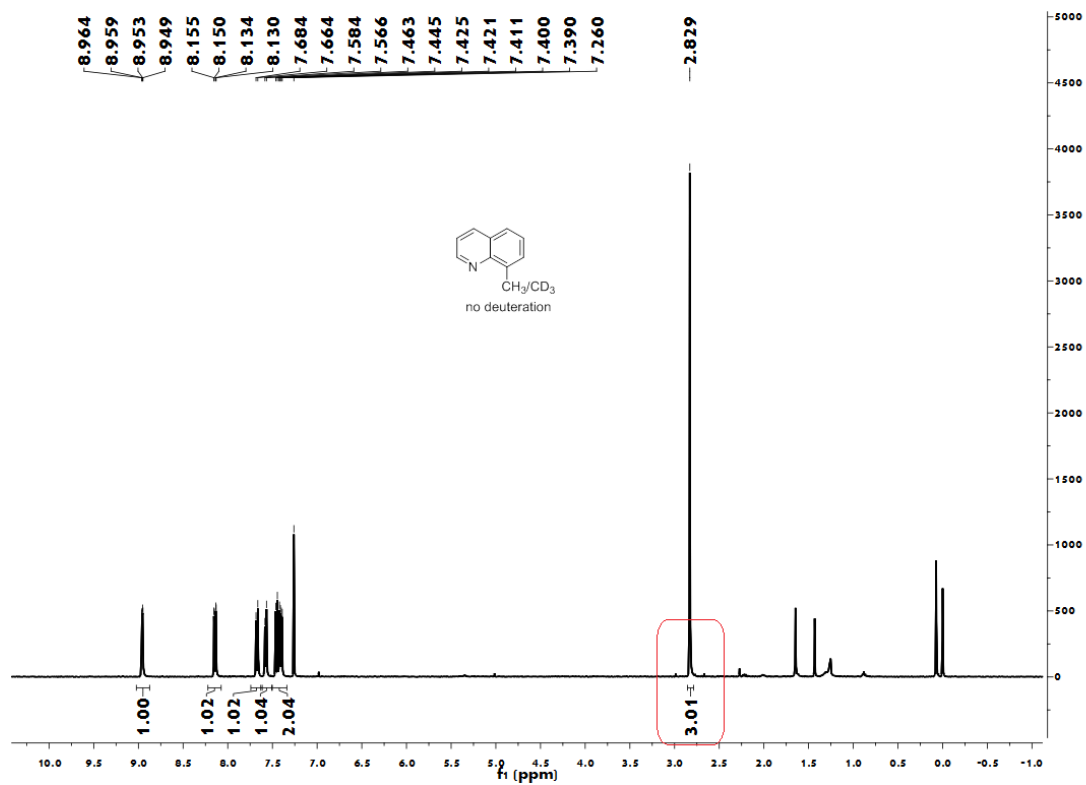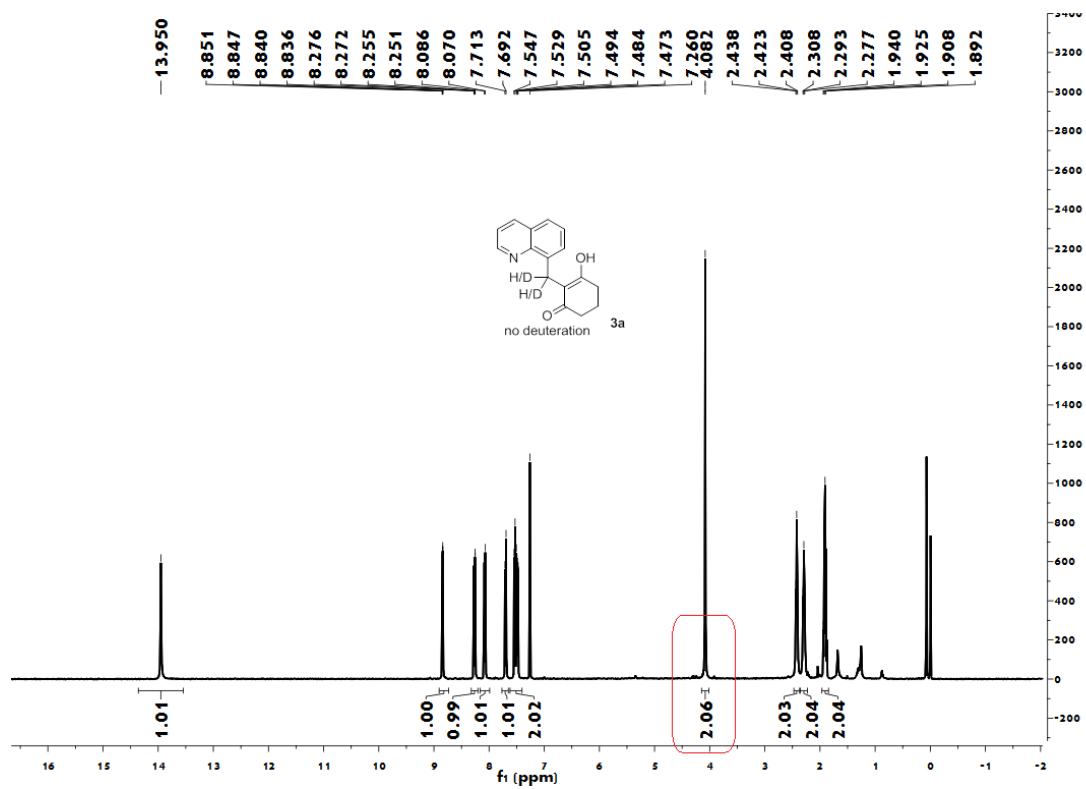



## (2) Competitive Reaction

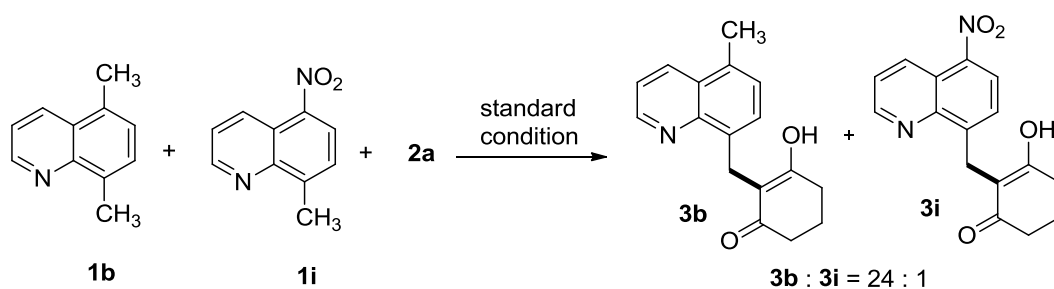

A mixture of **1b** (0.1 mmol), **1i** (0.1 mmol), Cp<sup>\*</sup>Rh(MeCN)<sub>3</sub>(SbF<sub>6</sub>)<sub>2</sub> (2.5 mol %), Cu(OAc)<sub>2</sub> (5 mol %), diazo compound **2a** (0.1 mmol) and DCE (1 mL) were added to a test tube. The reaction mixture was stirred at 55 °C for 3 h. The solution was filtered through a celite pad and washed with dichloromethane. Then, the solvent was removed under reduced pressure and the residue was purified by silica gel chromatography using PE/EA to afford compounds **3b** and **3i** as a mixture, which was characterized by <sup>1</sup>H NMR spectroscopy.

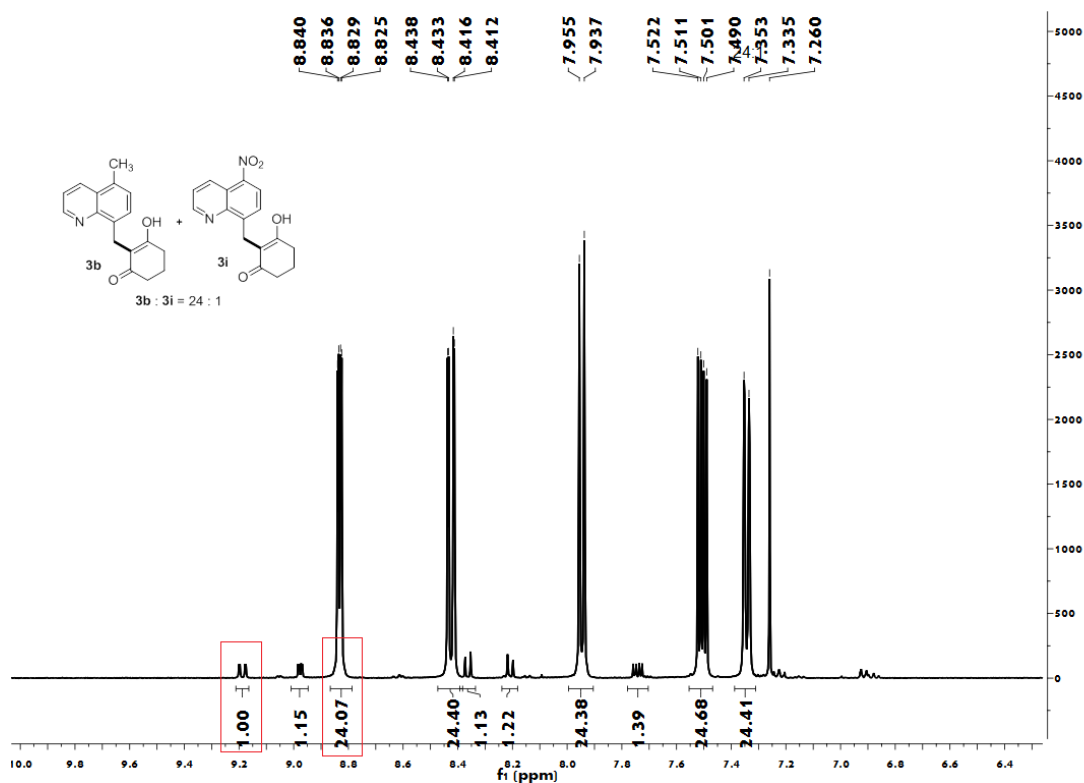

### (3) Synthesis of cyclometalated Rh(III) complex

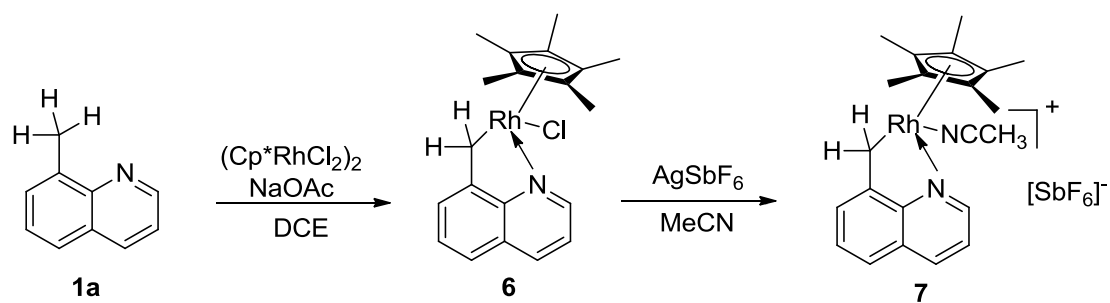

Rh(III) complex **6** was prepared according to the literature procedures.<sup>S3</sup> A mixture of substituted 8-methyl-quinoline (0.6 mmol),  $[\text{Cp}^*\text{RhCl}_2]_2$  (5.0 mol %), NaOAc (0.3 mmol) and MeOH (1 mL) were weighted in a Schlenk tube equipped with a stir bar. The reaction mixture was stirred at 80 °C overnight, concentrated under vacuum. The product was purified by flash column chromatography on silica gel (eluent: EtOAc/petroleum ether = 1: 2, 20% yield).

To the suspension of Rh(III) complex **6** (0.23 mmol) in dried  $\text{CH}_3\text{CN}$  (1.5 mL), the solution of  $\text{AgSbF}_6$  (1 mmol) in dried  $\text{CH}_3\text{CN}$  (2 mL) was added in 2 min. Then the white solid precipitated immediately. The reaction was stirred at rt for another 3 h. Then the solid was removed by filtration on celite and washed with  $\text{CH}_3\text{CN}$ . The filtrate was evaporated in vacuo and then  $\text{Et}_2\text{O}$  was added dropwise and the brown solid precipitated. The solid was collected by filtration, washed with EtOAc and  $\text{Et}_2\text{O}$ , dried in vacuo to afford Rh(III) complex **7** (50% yield). The structure of Rh(III) complex **9** was unambiguously confirmed by X-ray analysis (CCDC 1049041).

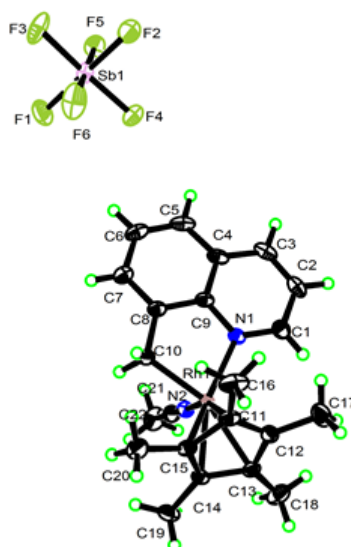

**Reference:**

S1: K. Fujita, Y. Takahashi, M. Owaki, K. Yamamoto, R. Yamaguchi, *Org. Lett.* **2004**, *6*, 2785.

S2: Yang Li, Bi-Jie Li, Wen-Hua Wang, Wei-Ping Huang, Xi-Sha Zhang, Kang Chen, Zhang-Jie Shi, *Angew. Chem. Int. Ed.*, **2011**, *50*, 2115.

S3: Bingxian Liu, Tao Zhou, Bin Li, Shansheng Xu, Haibin Song, and Baiquan Wang, *Angew. Chem. Int. Ed.*, **2014**, *53*, 4191.

S4: (a) M. P. Doyle, M. McKervey, T. Ye, *Modern, Catalytic Methods for Organic Synthesis with Diazo Compounds*, John Wiley & Sons Inc: New York, **1998**, Ch. 1, p.10; (b) Z. M. Jászay, T. S. Pham, K. Gönczi, I. Petneházy, L. Tőke, *Synthetic Communications*, **2010**, *40*, 1574.

# $^1\text{H}$ and $^{13}\text{C}$ NMR Spectra of Compounds

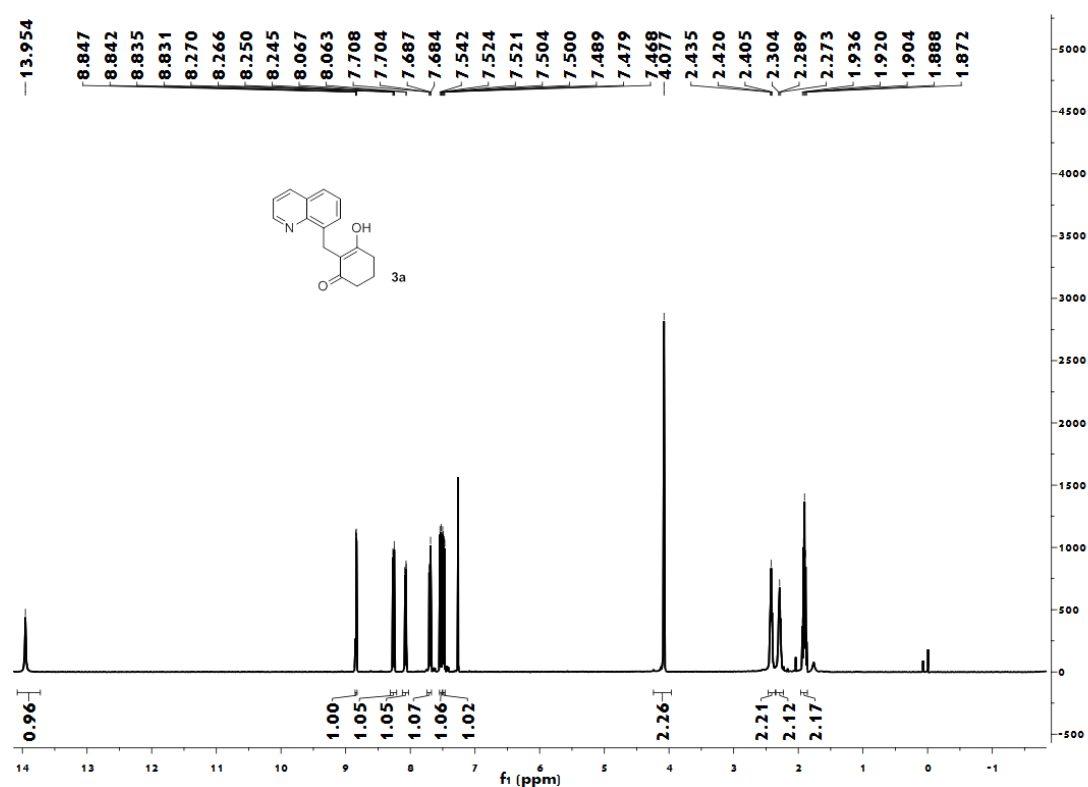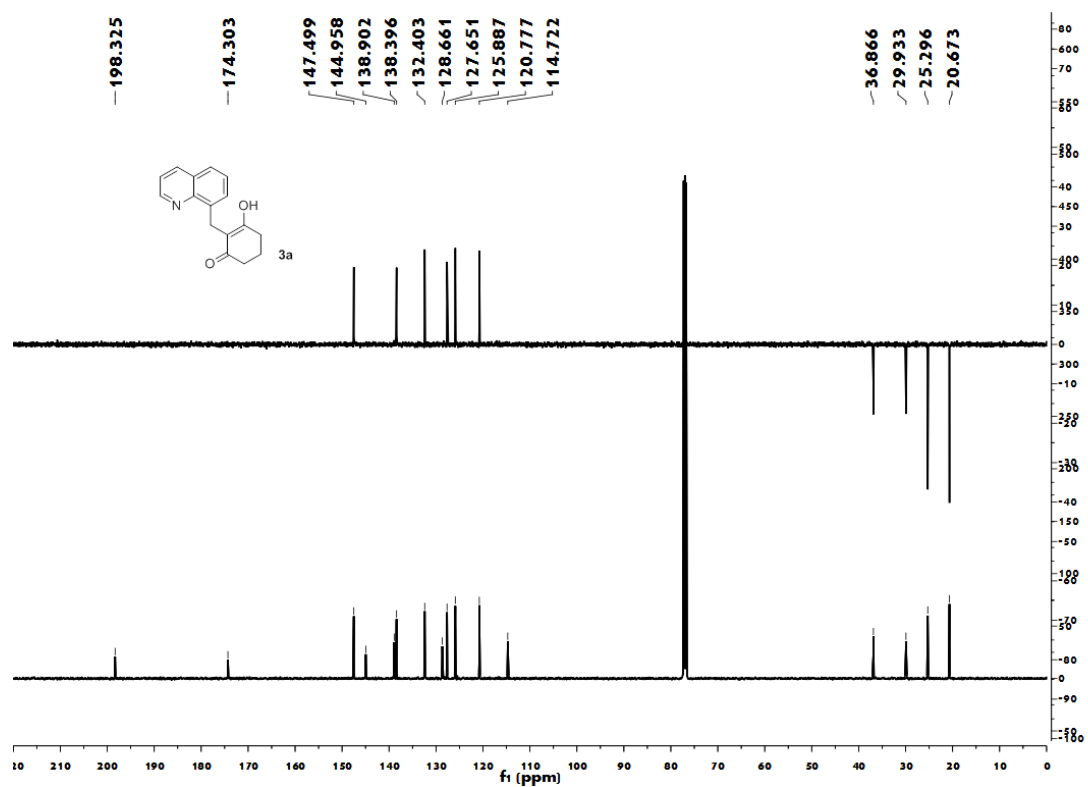

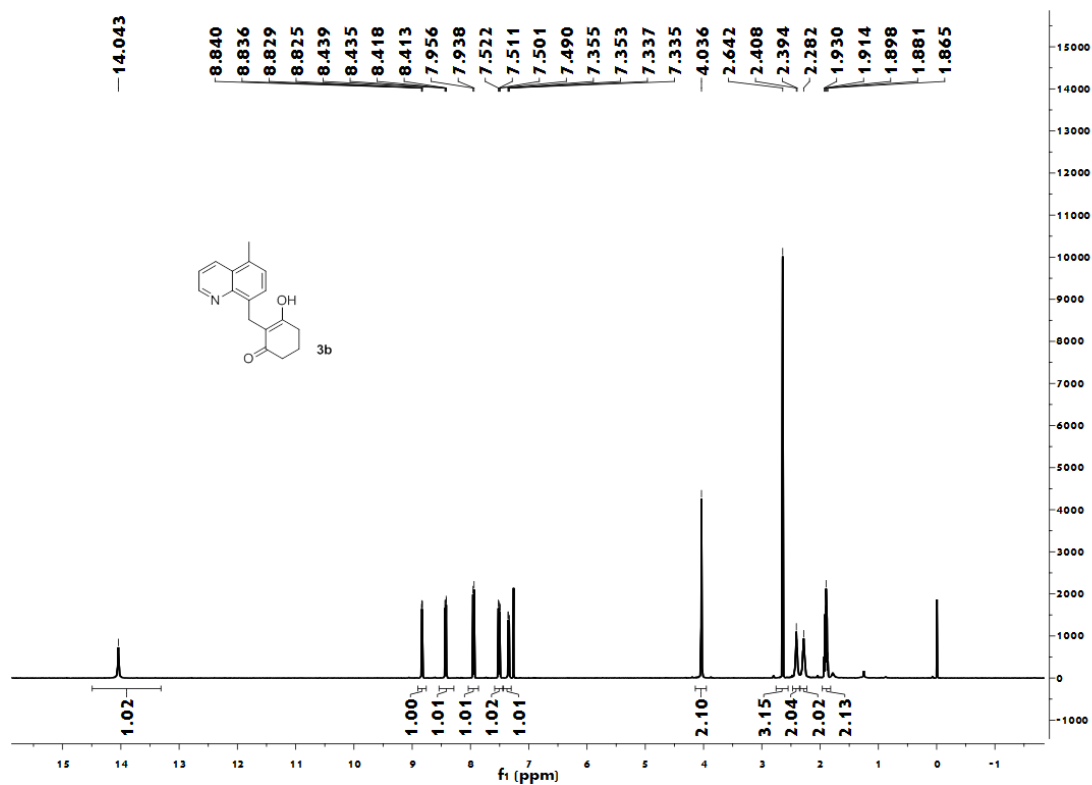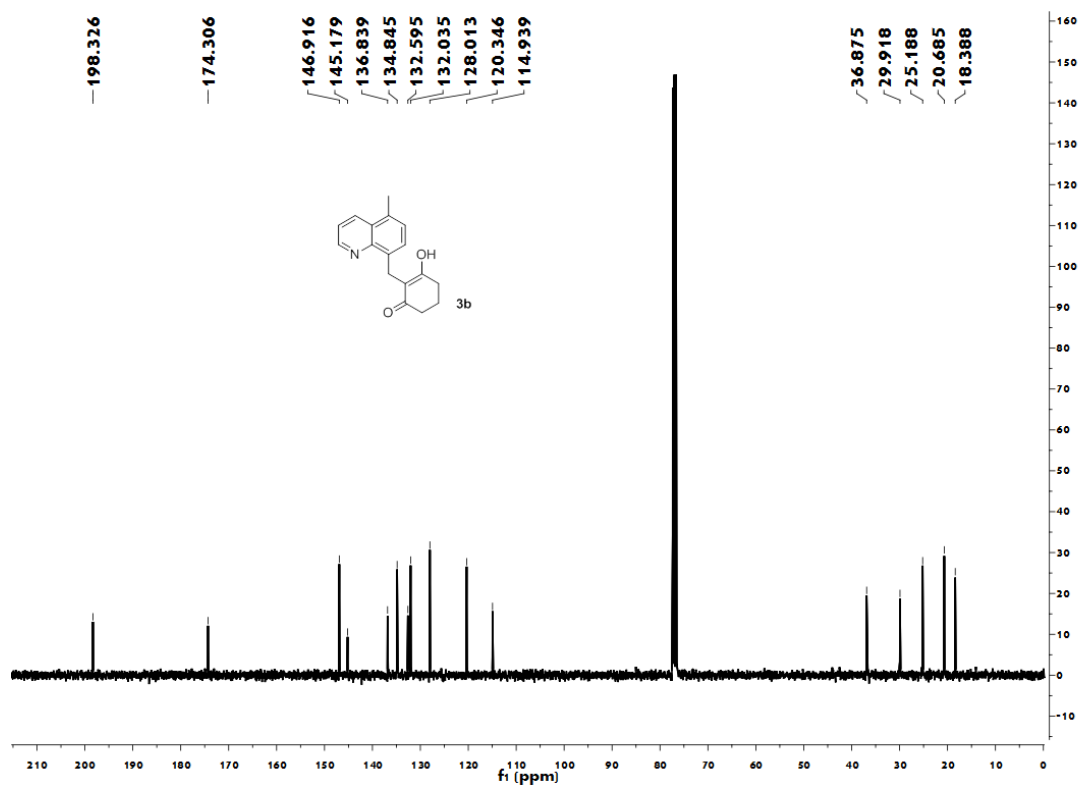

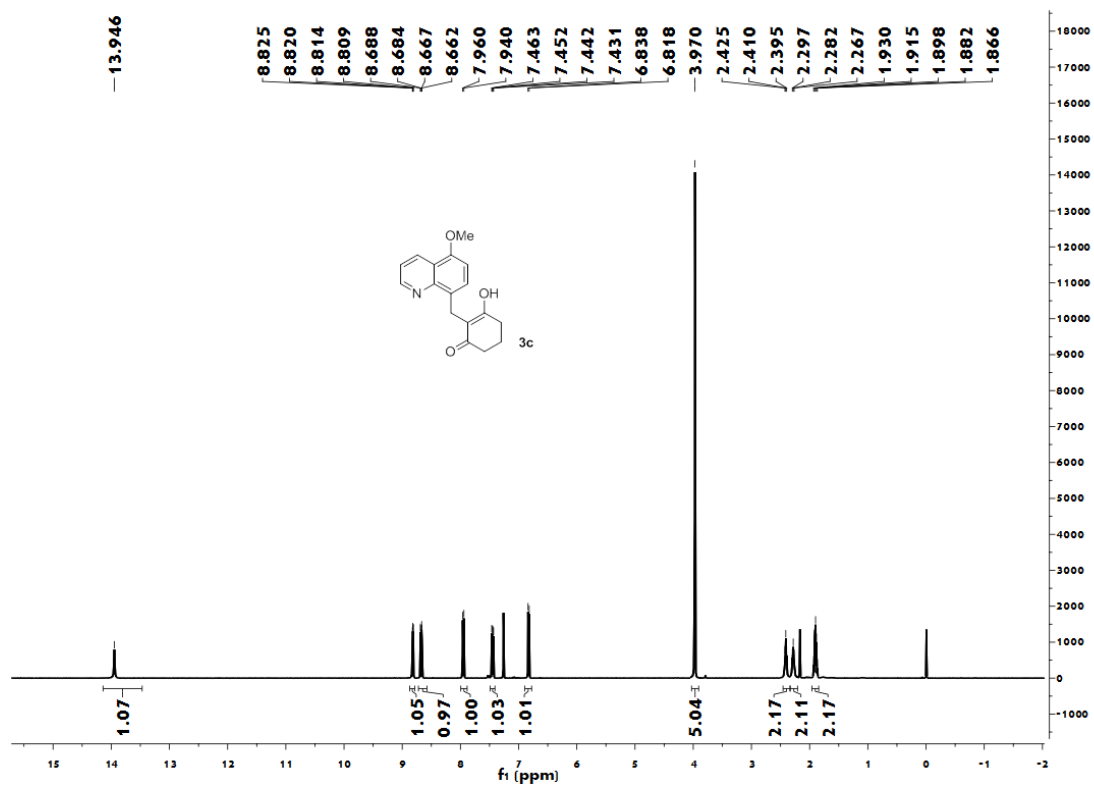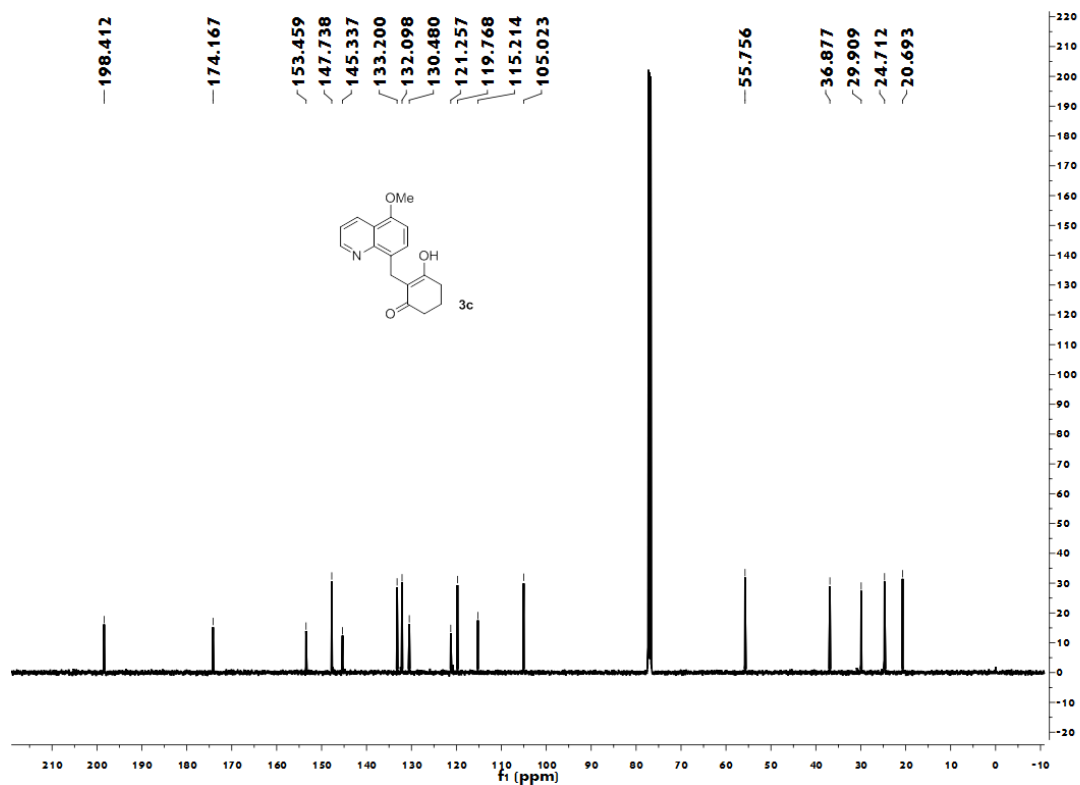

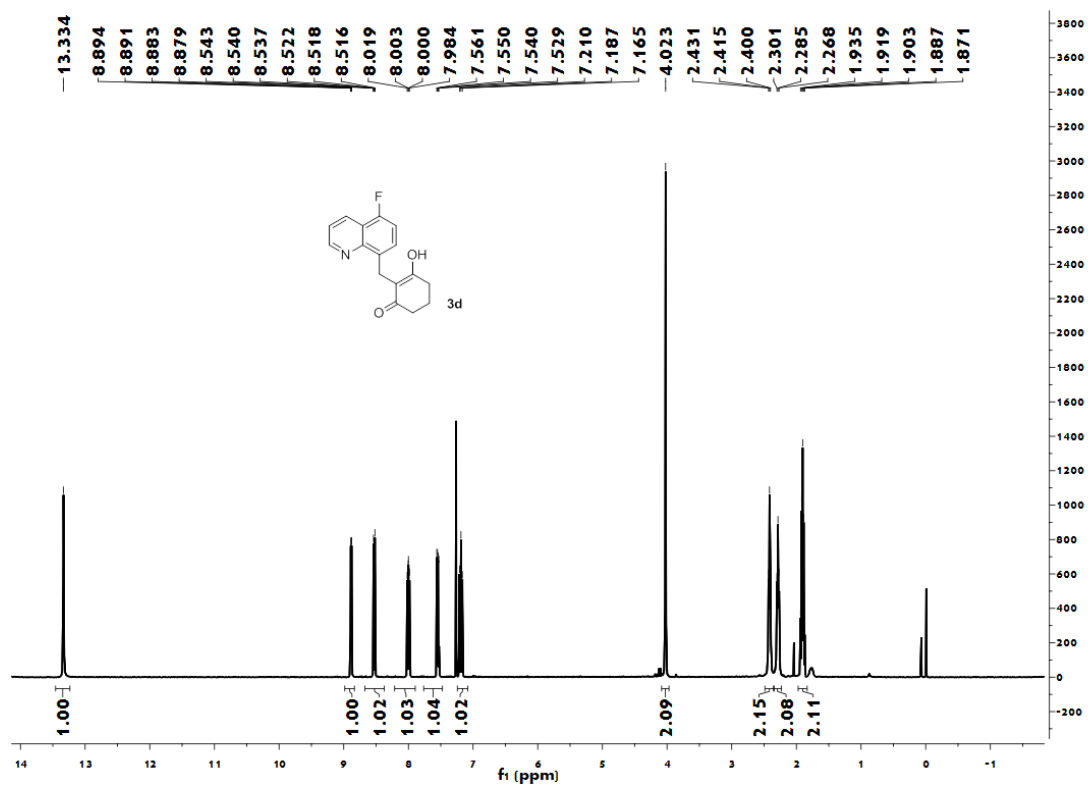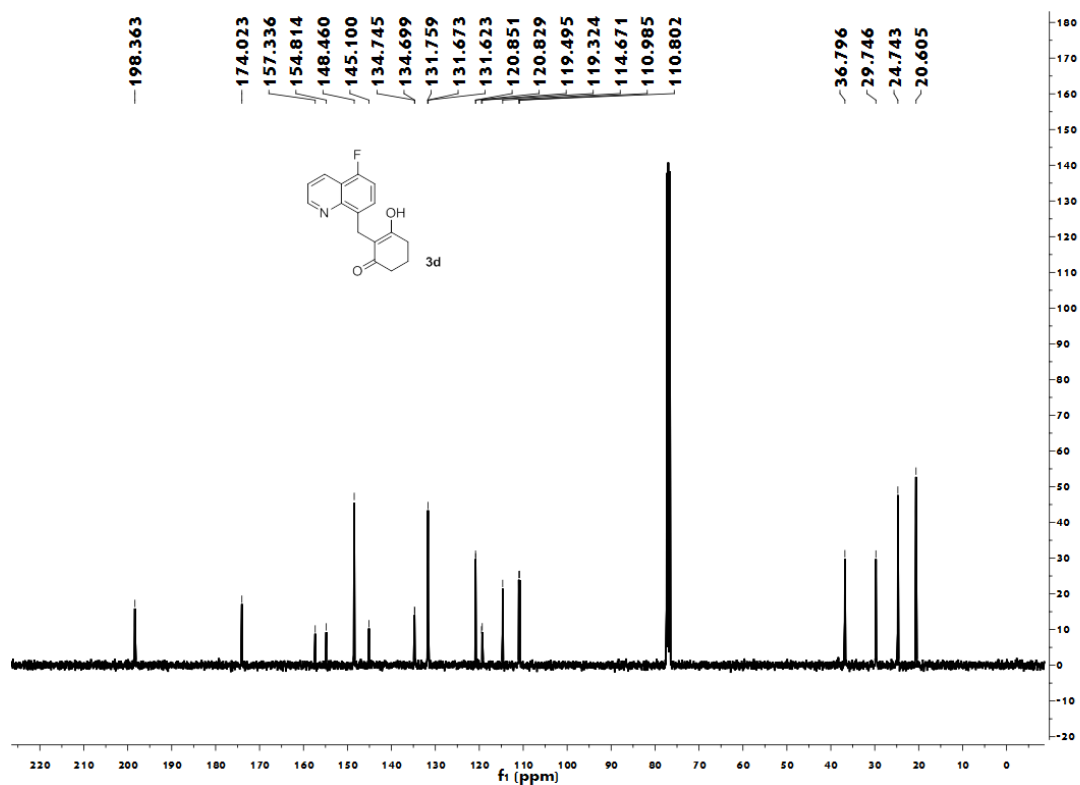

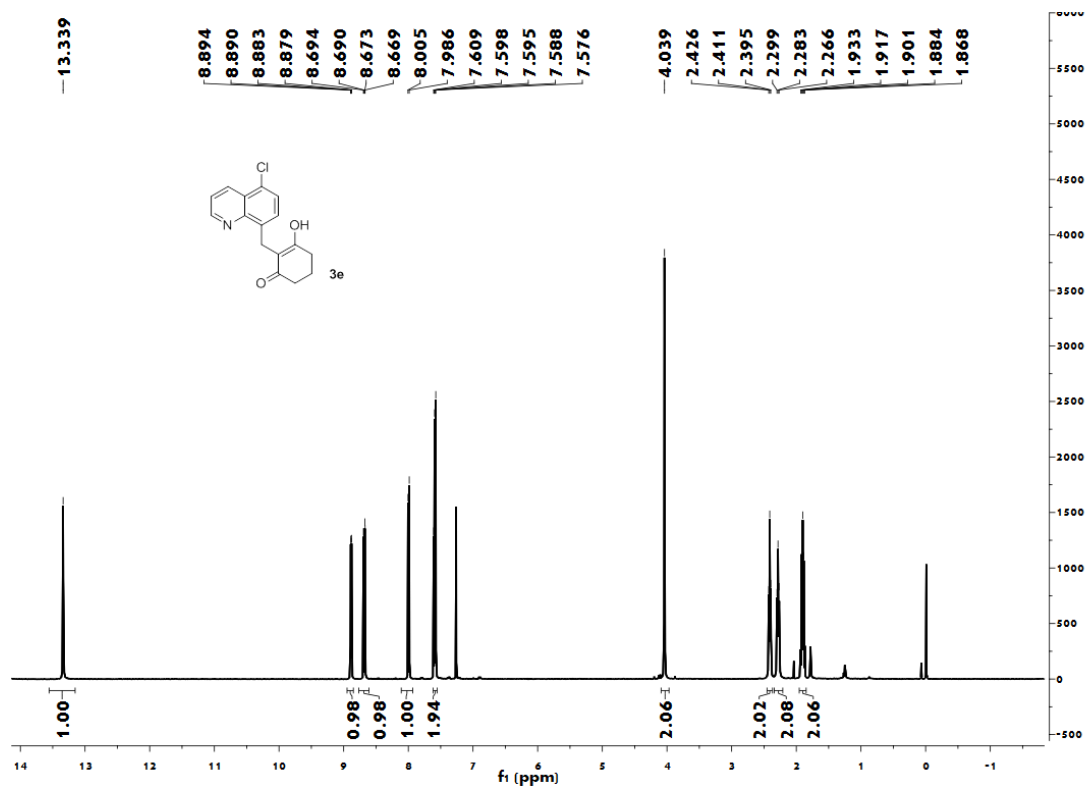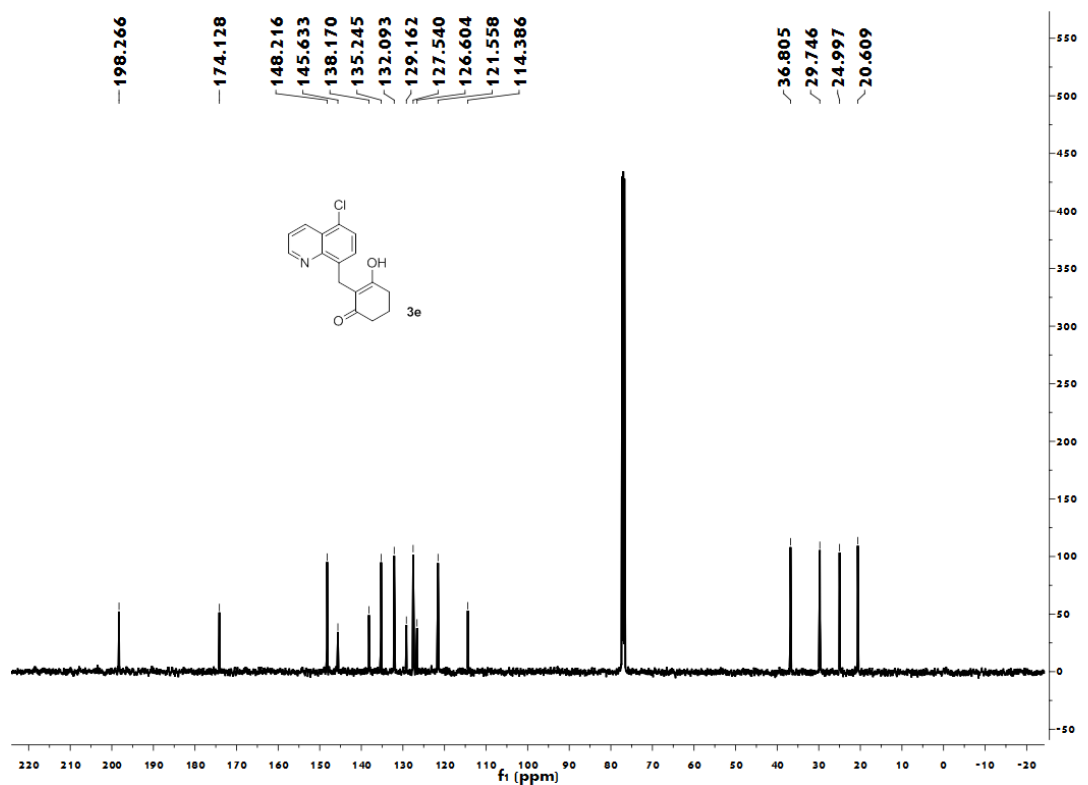



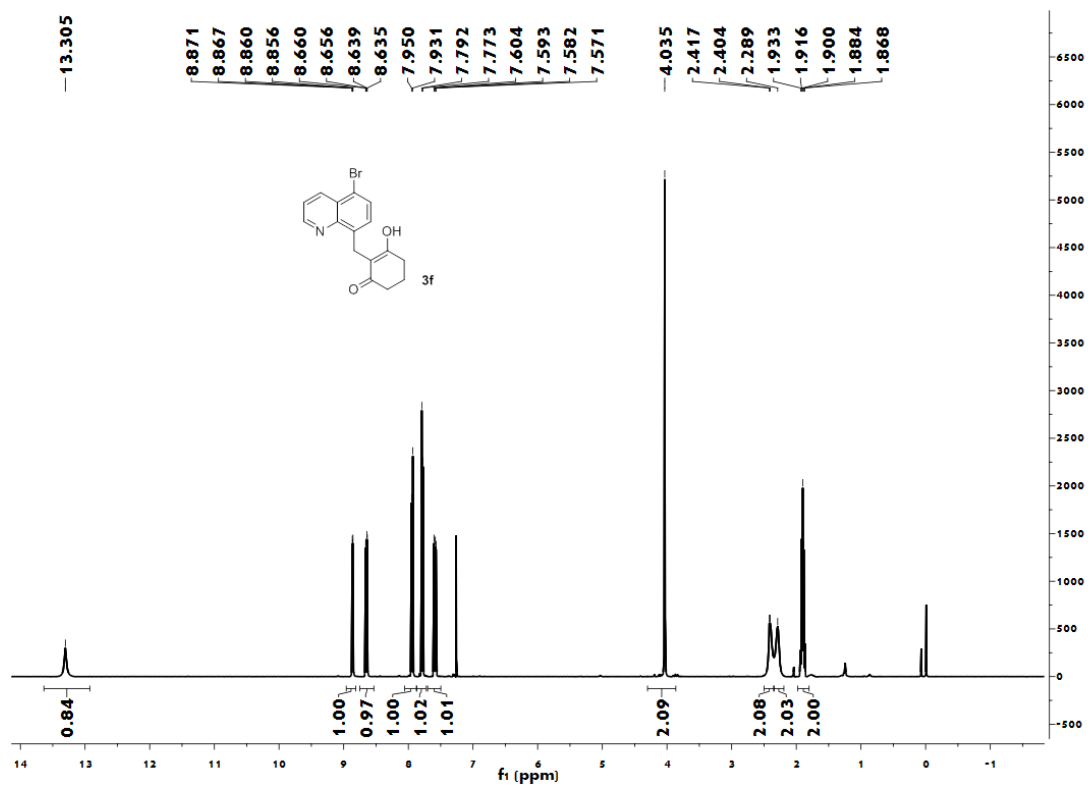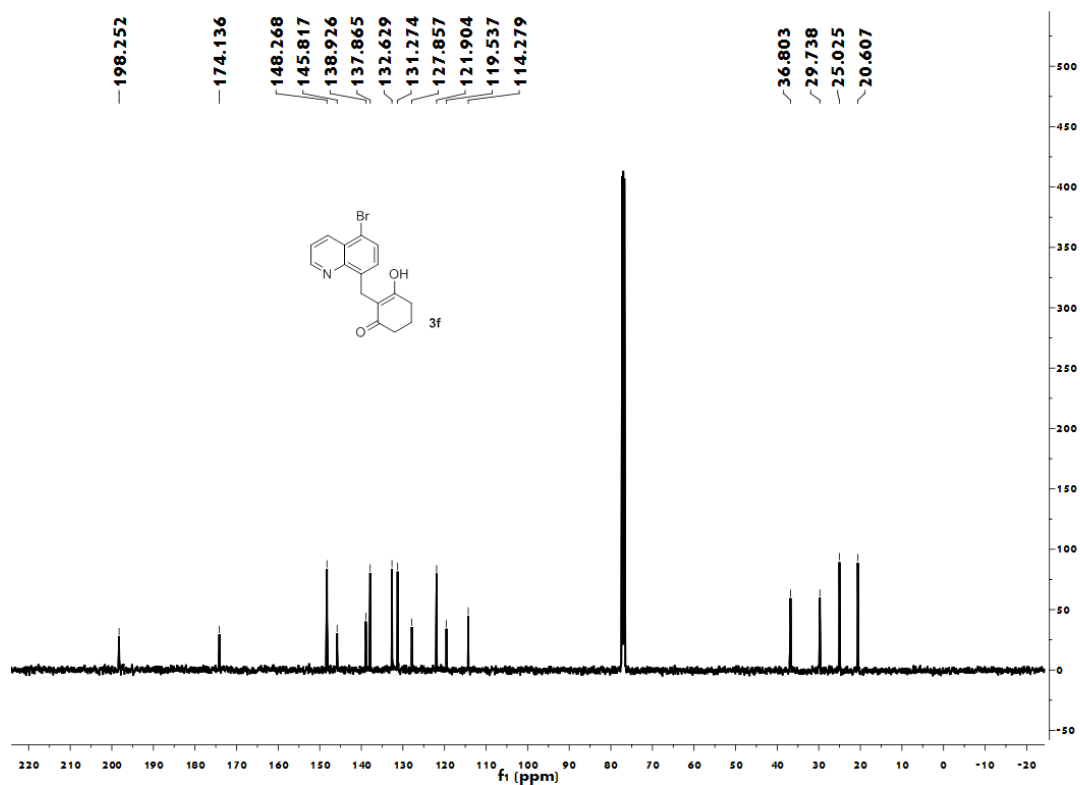

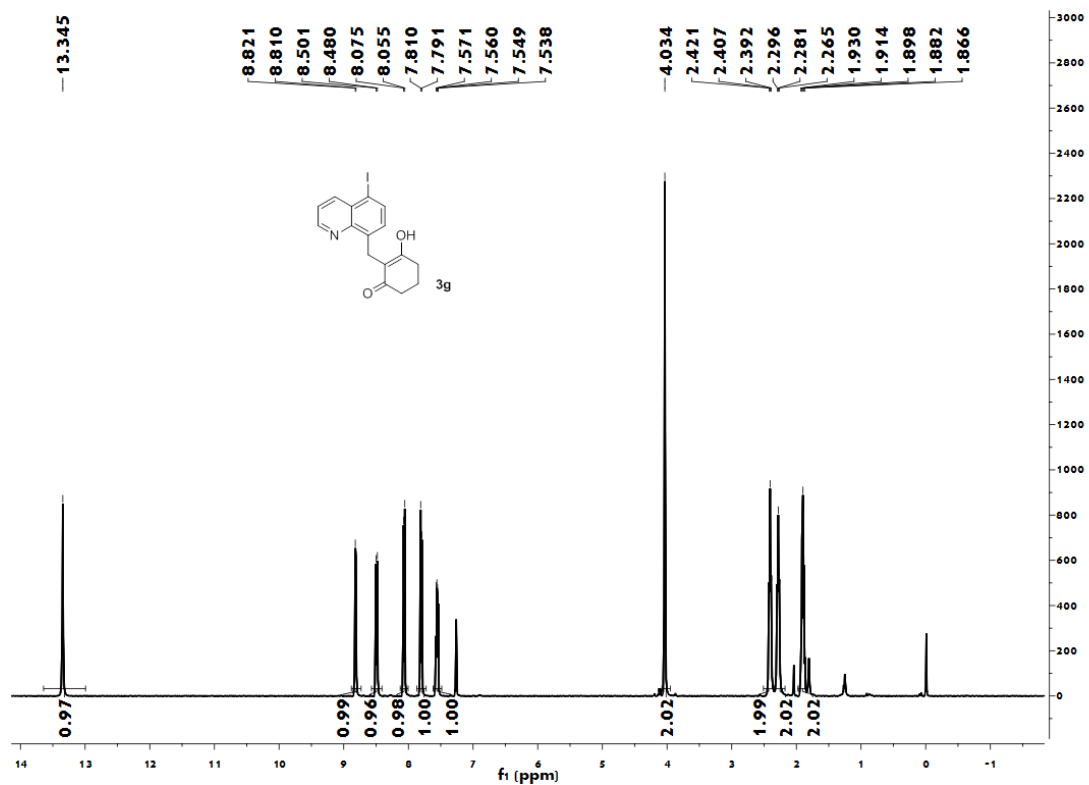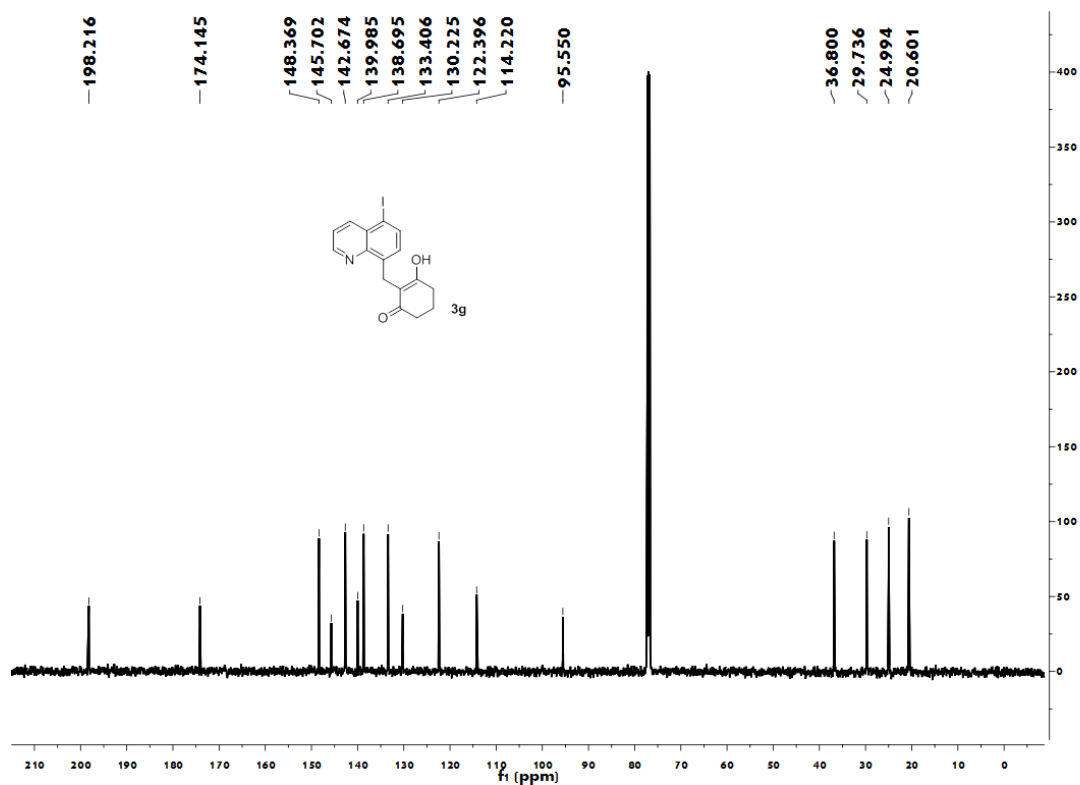

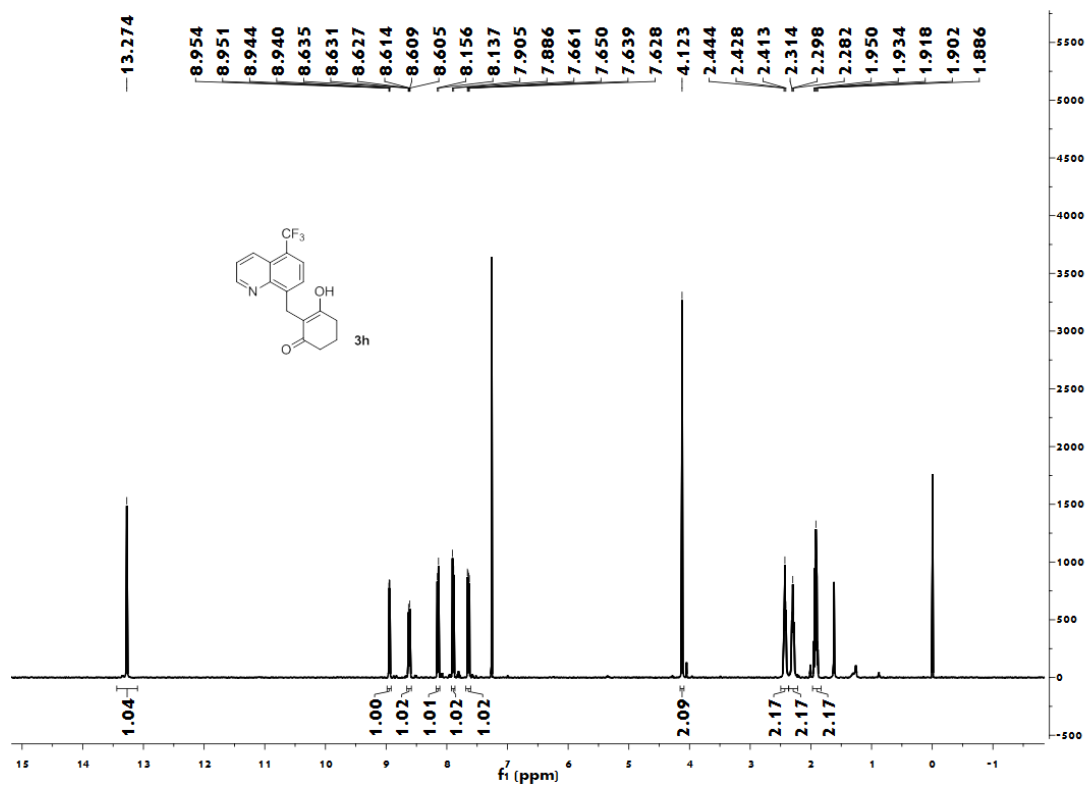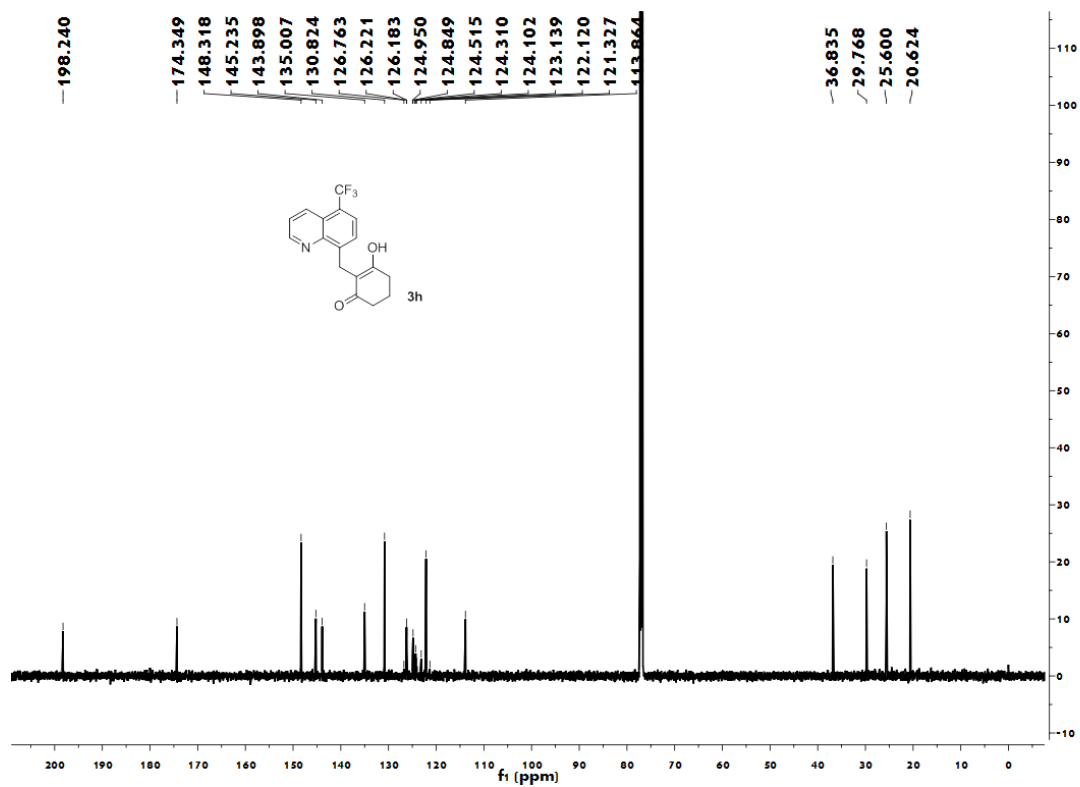

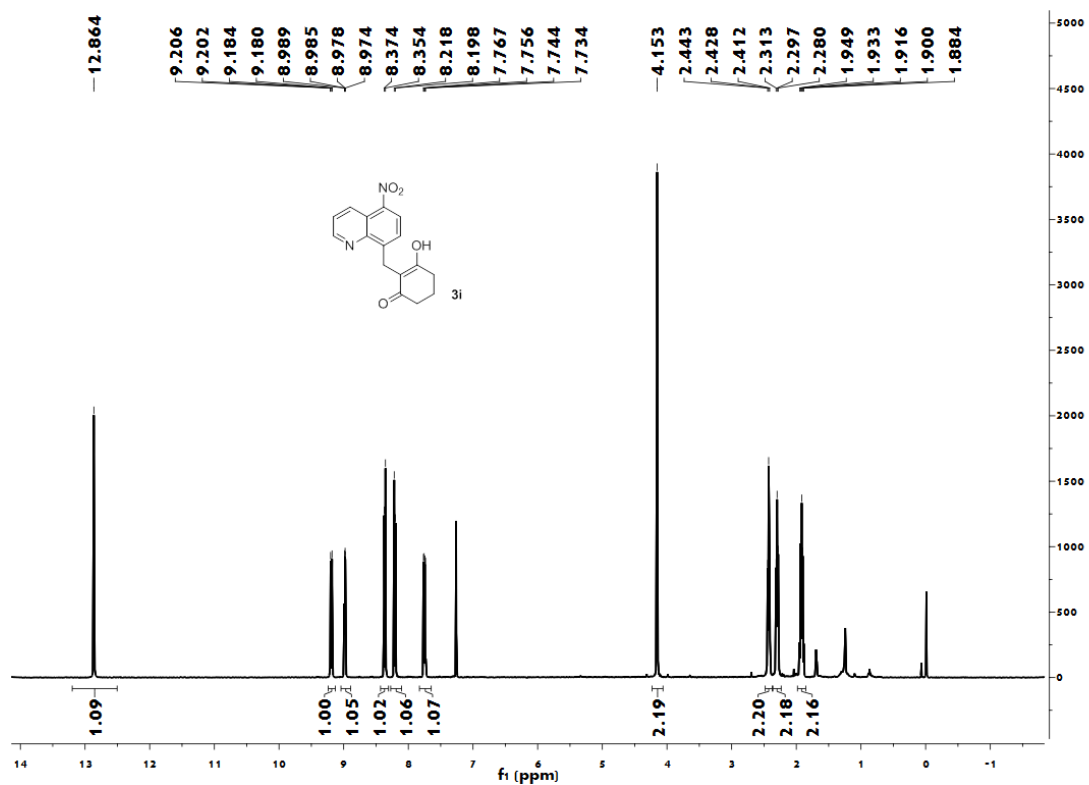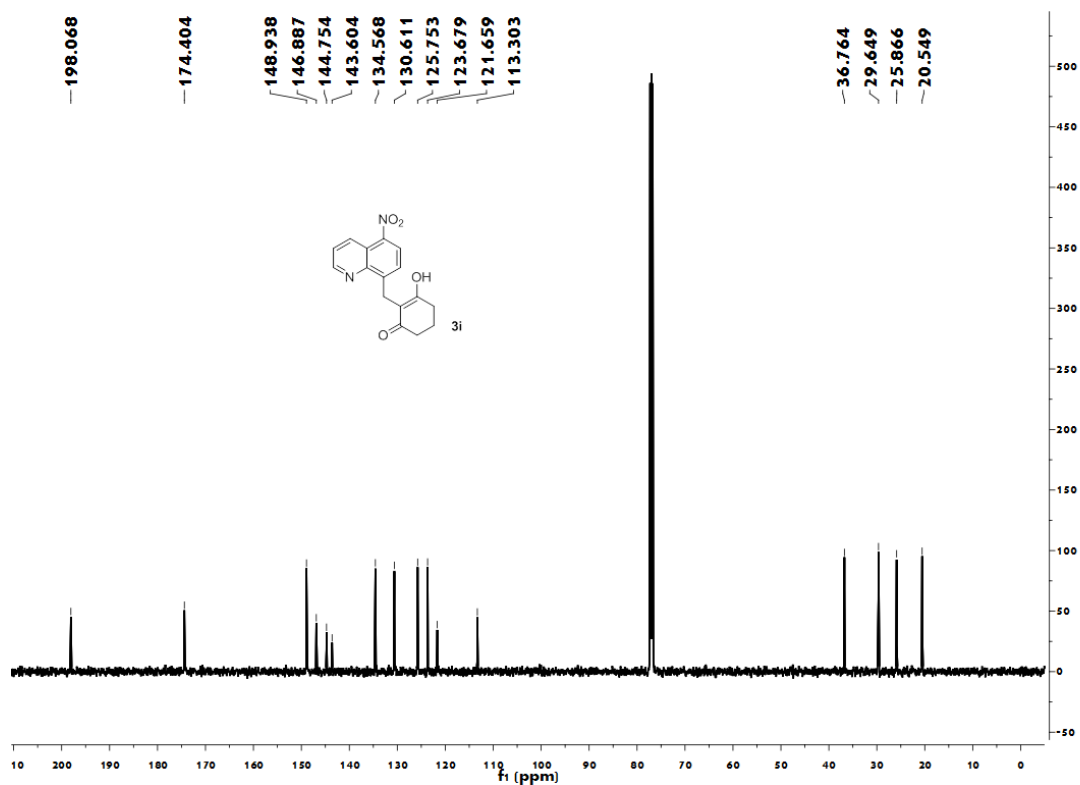

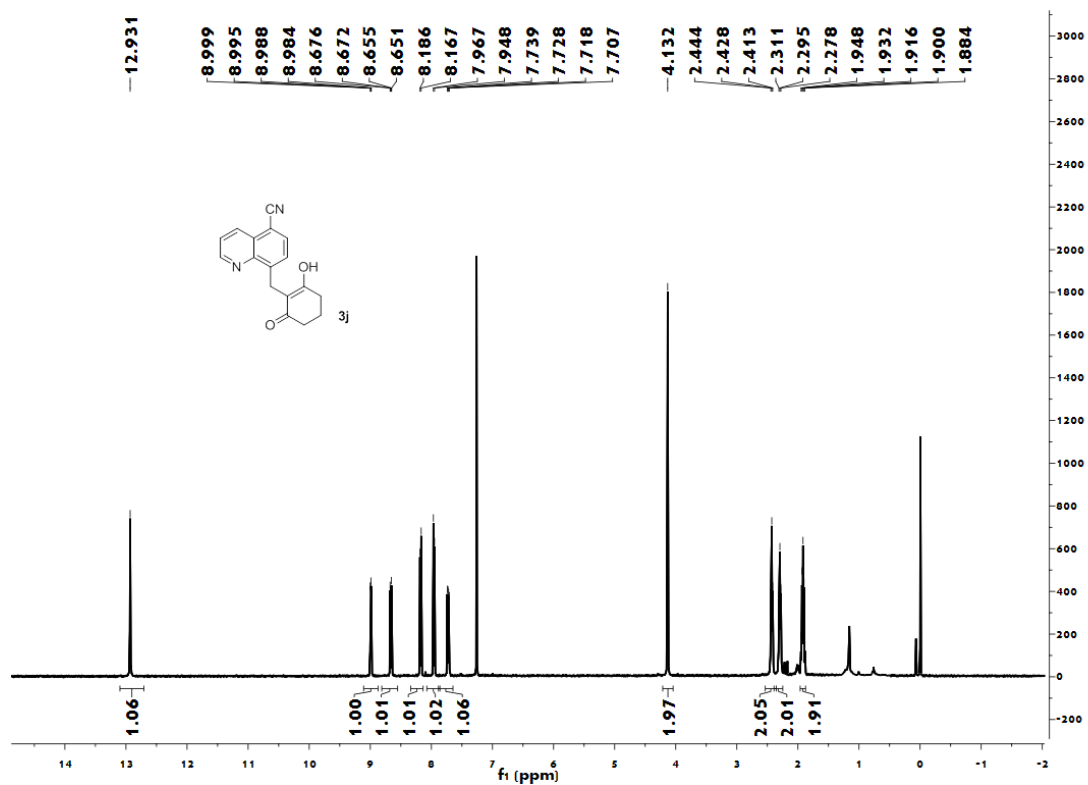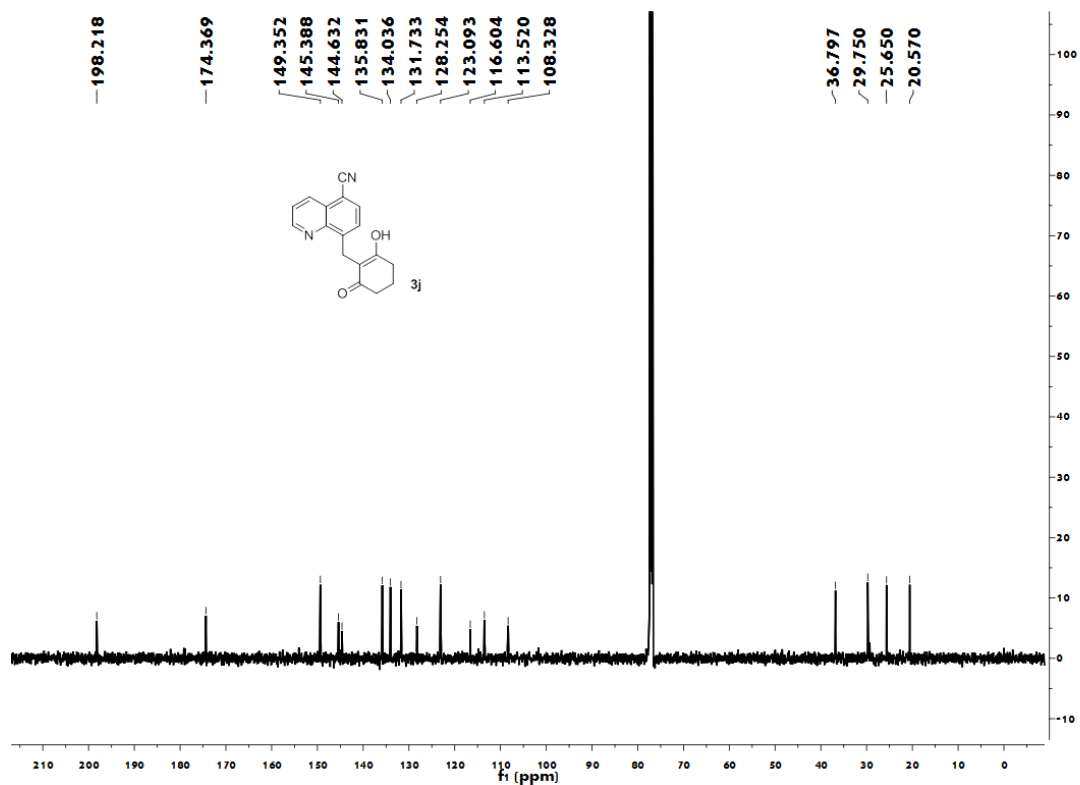

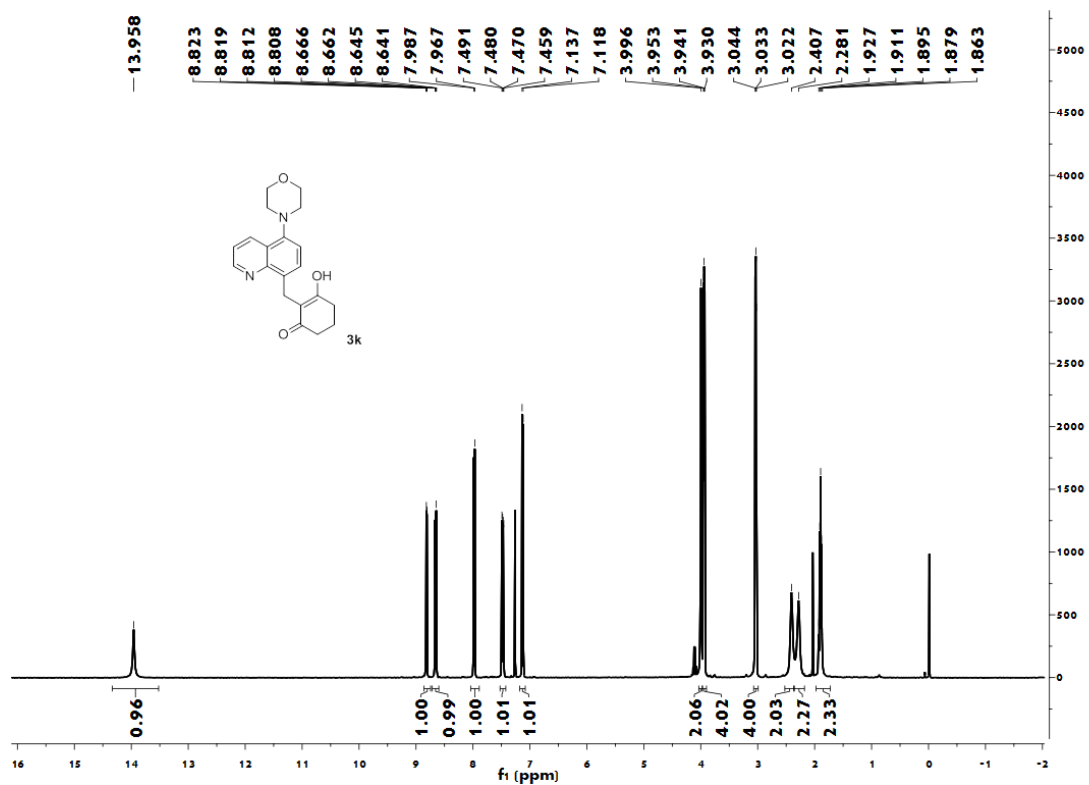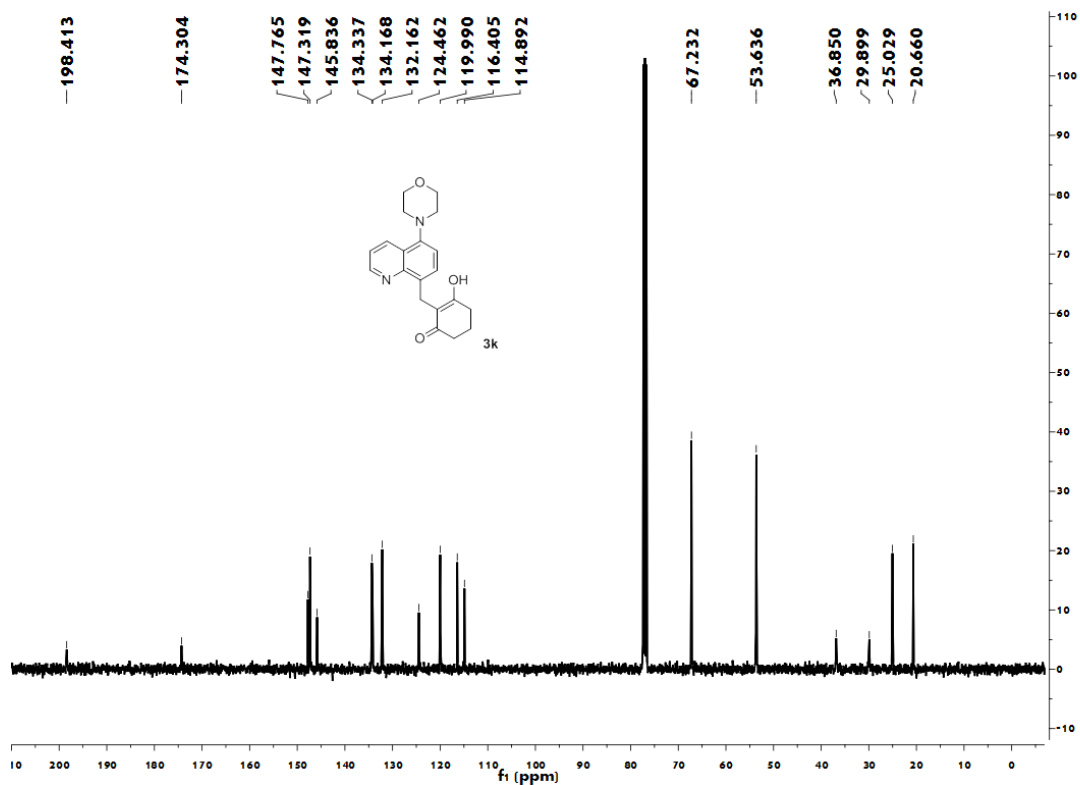

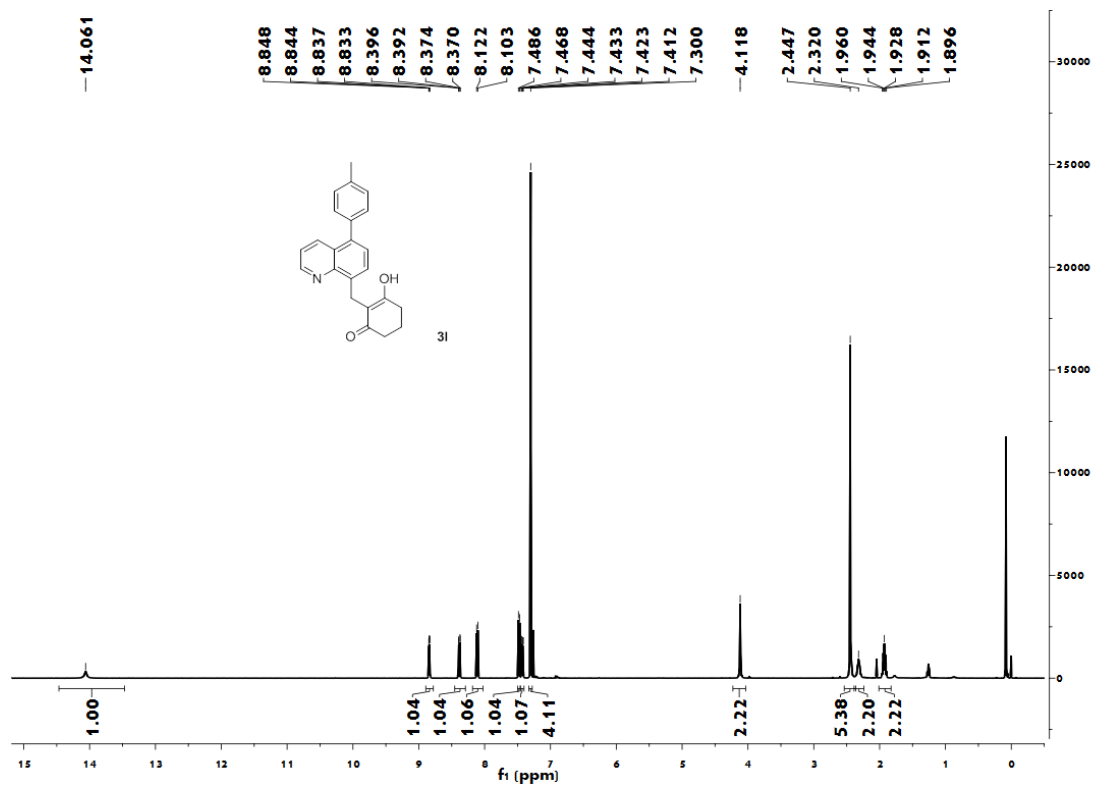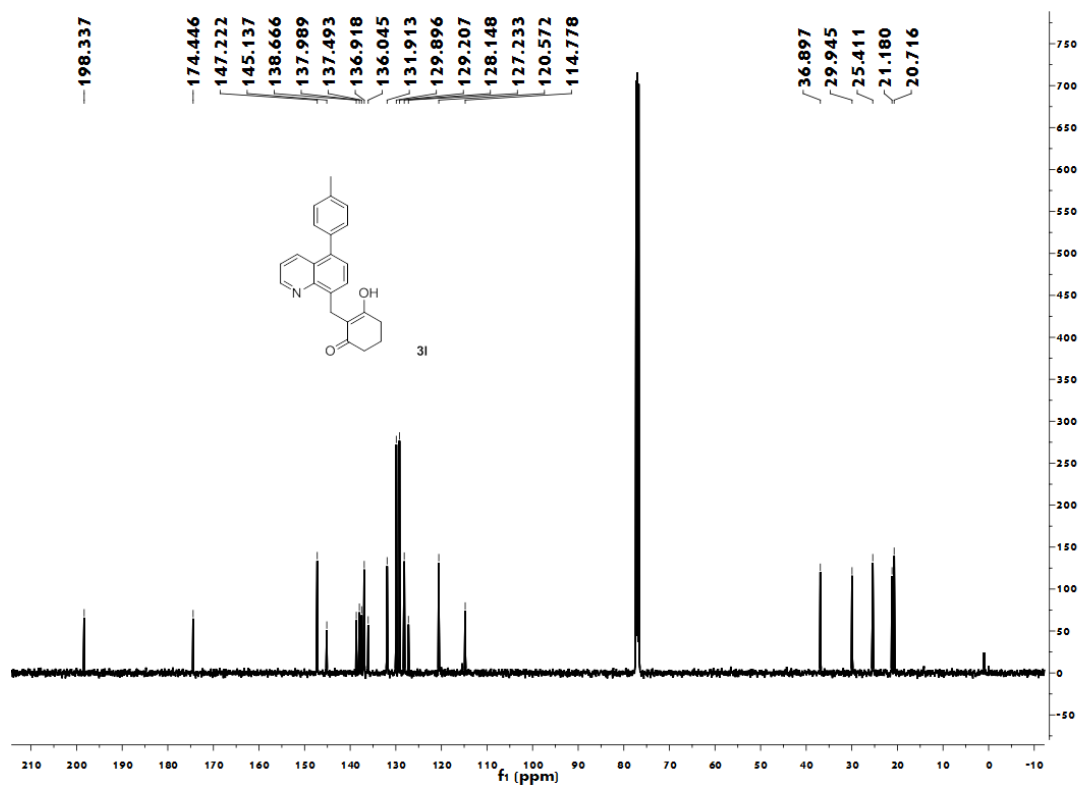

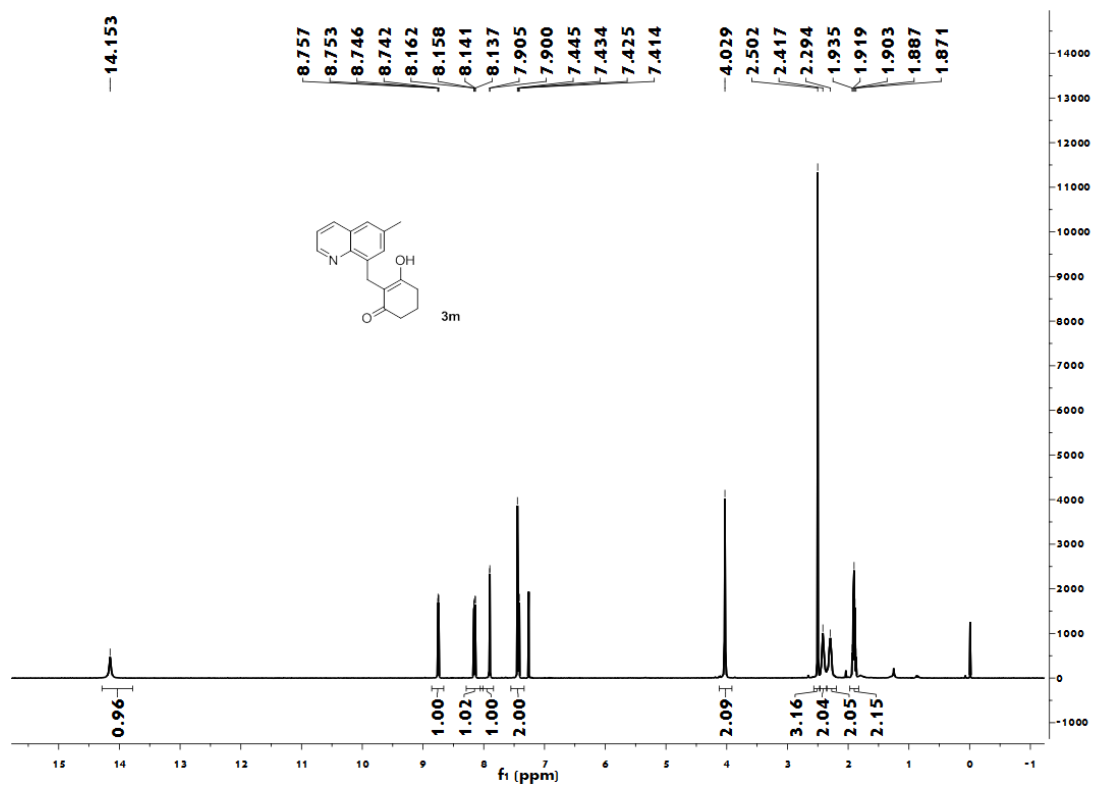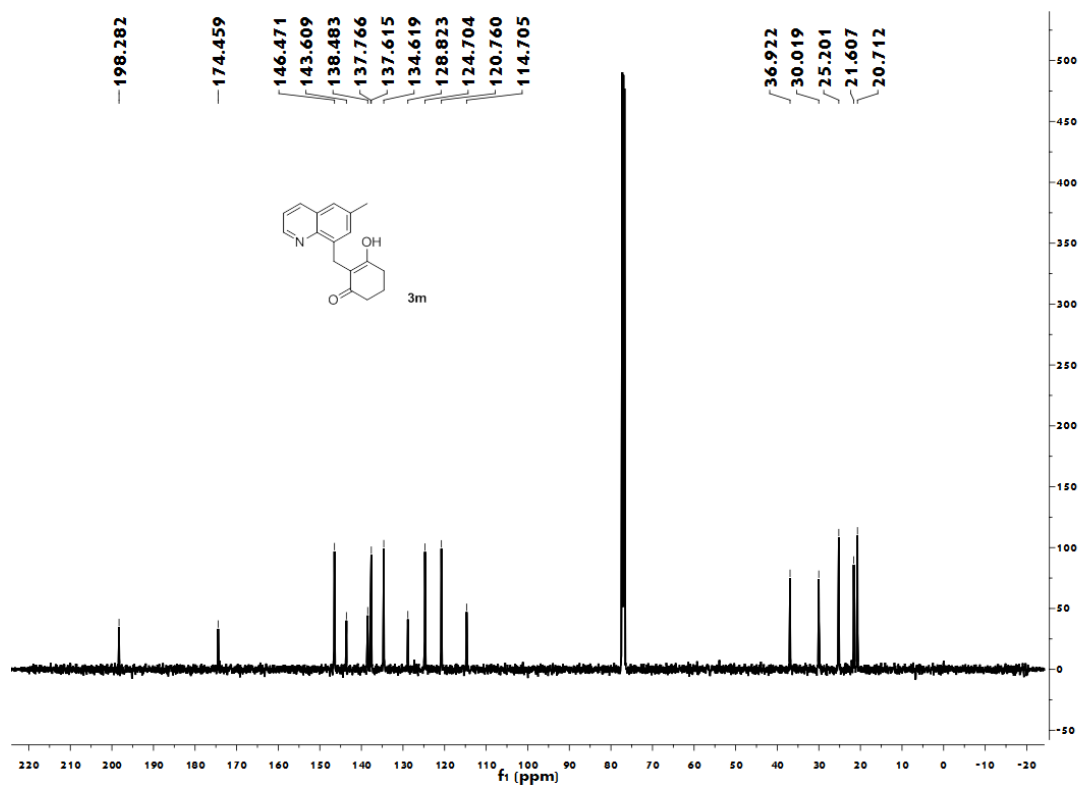



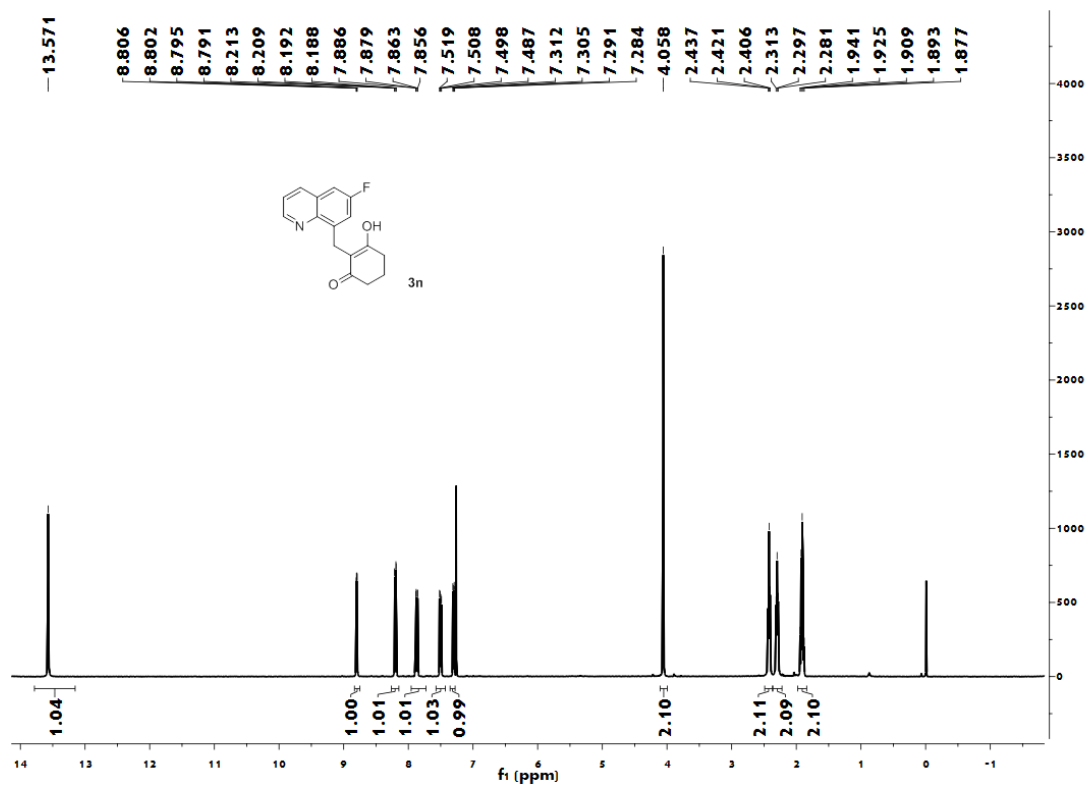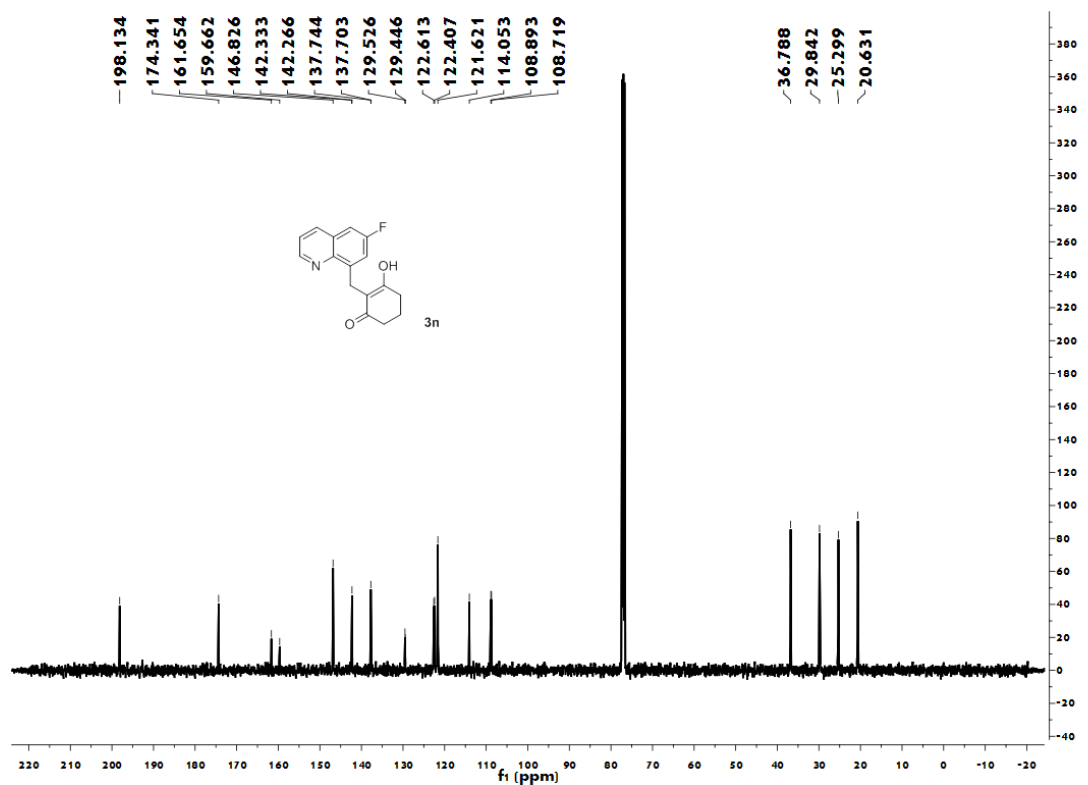

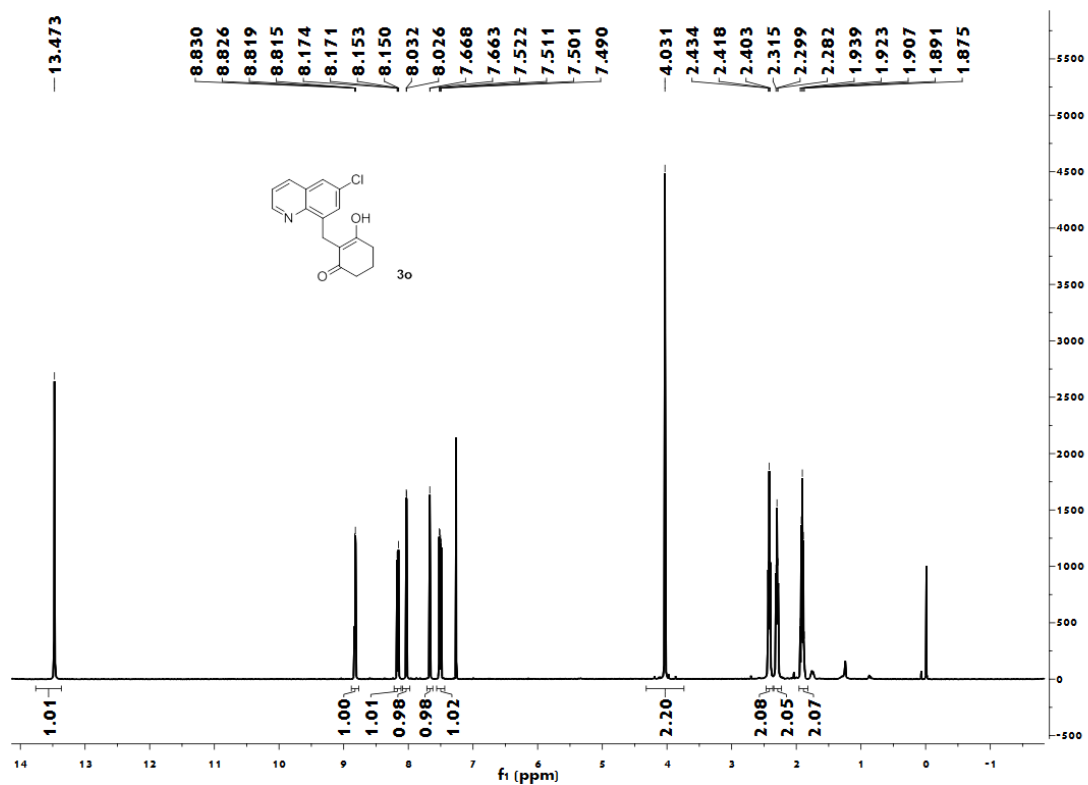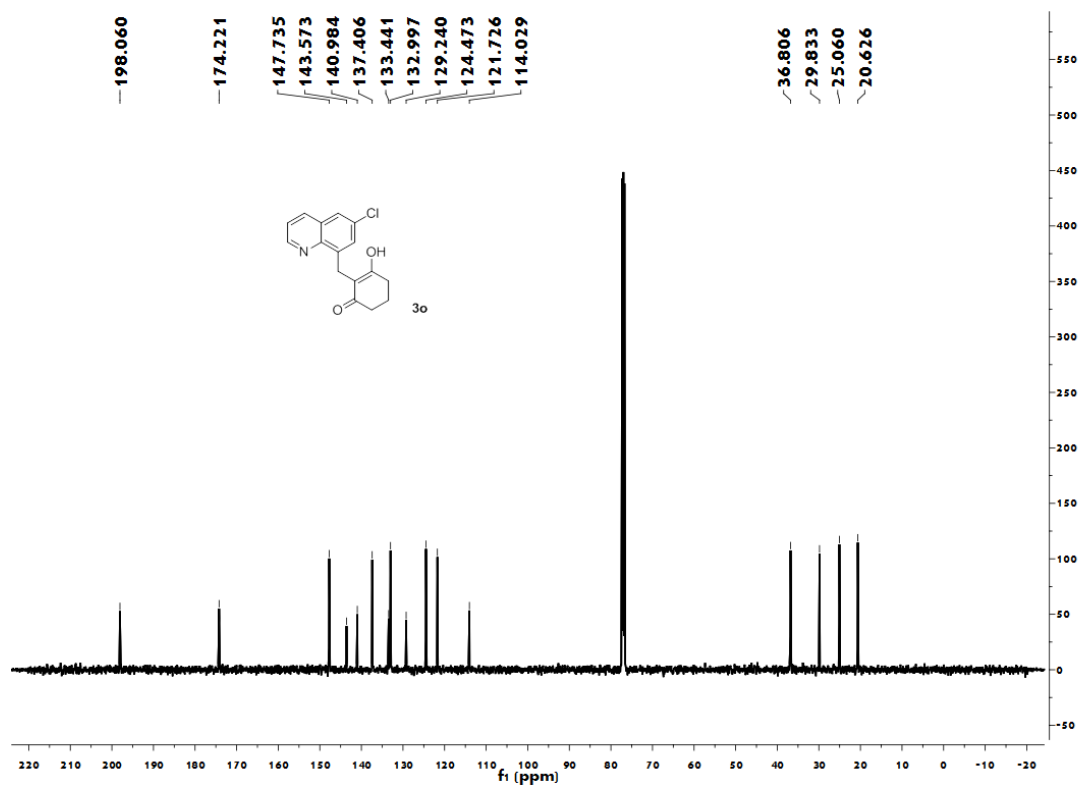

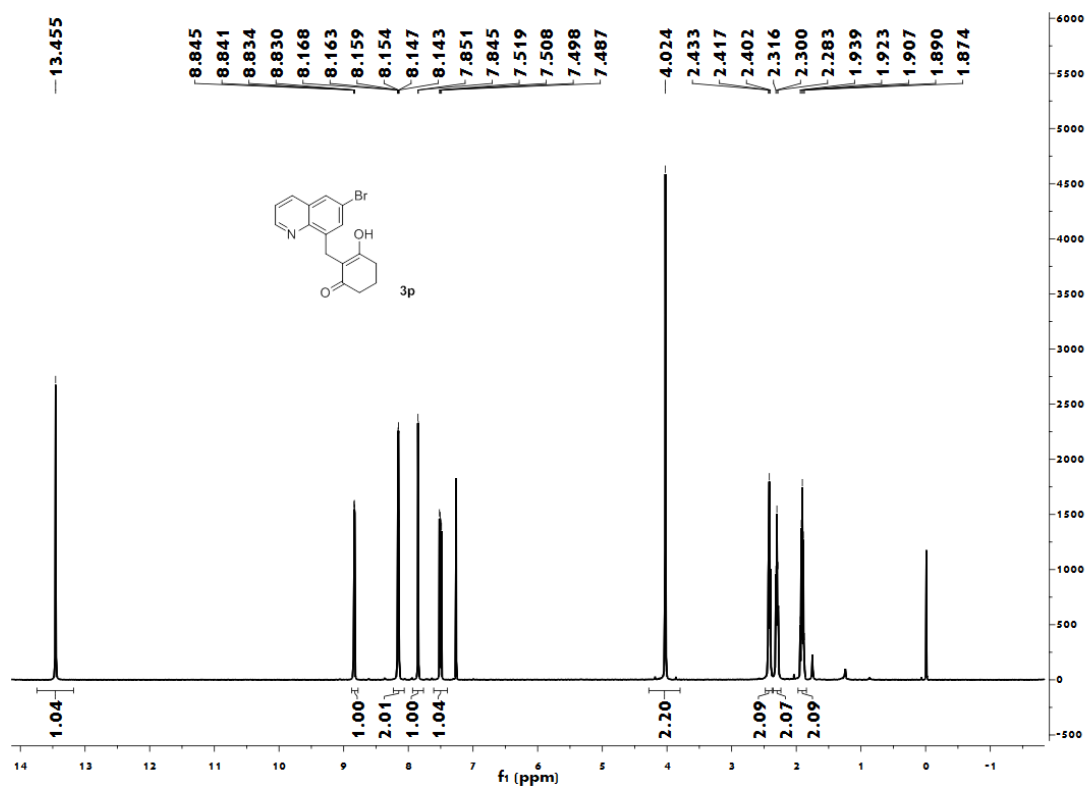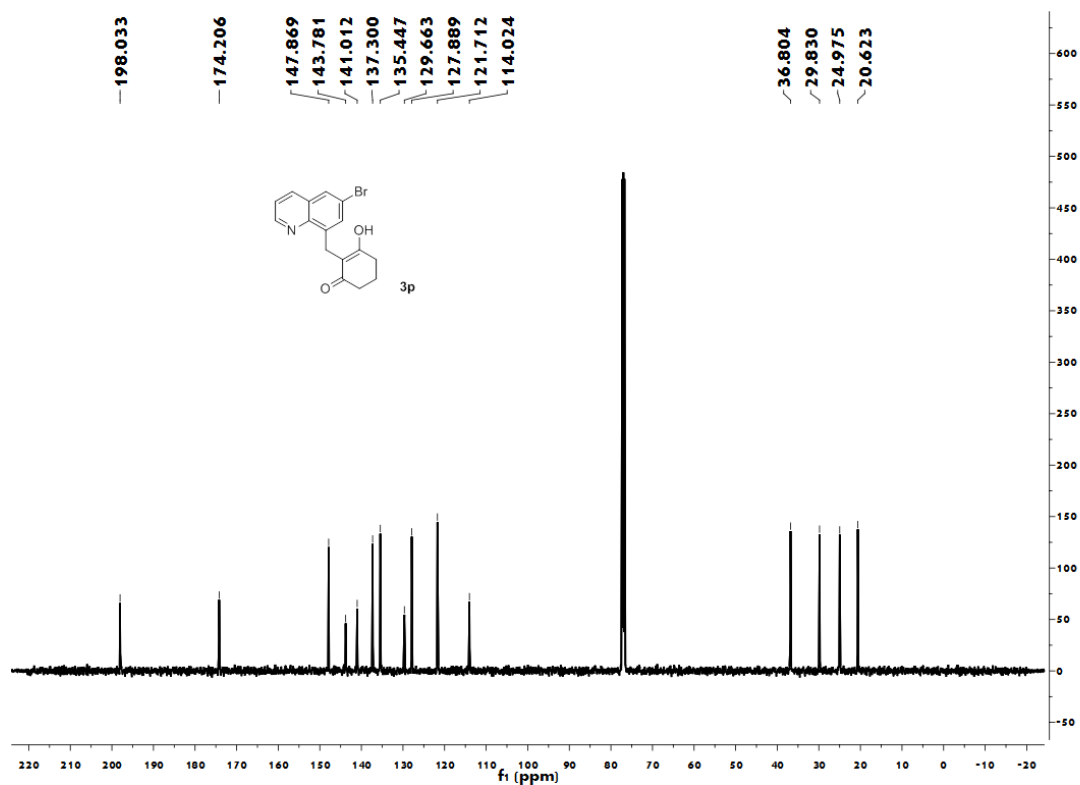

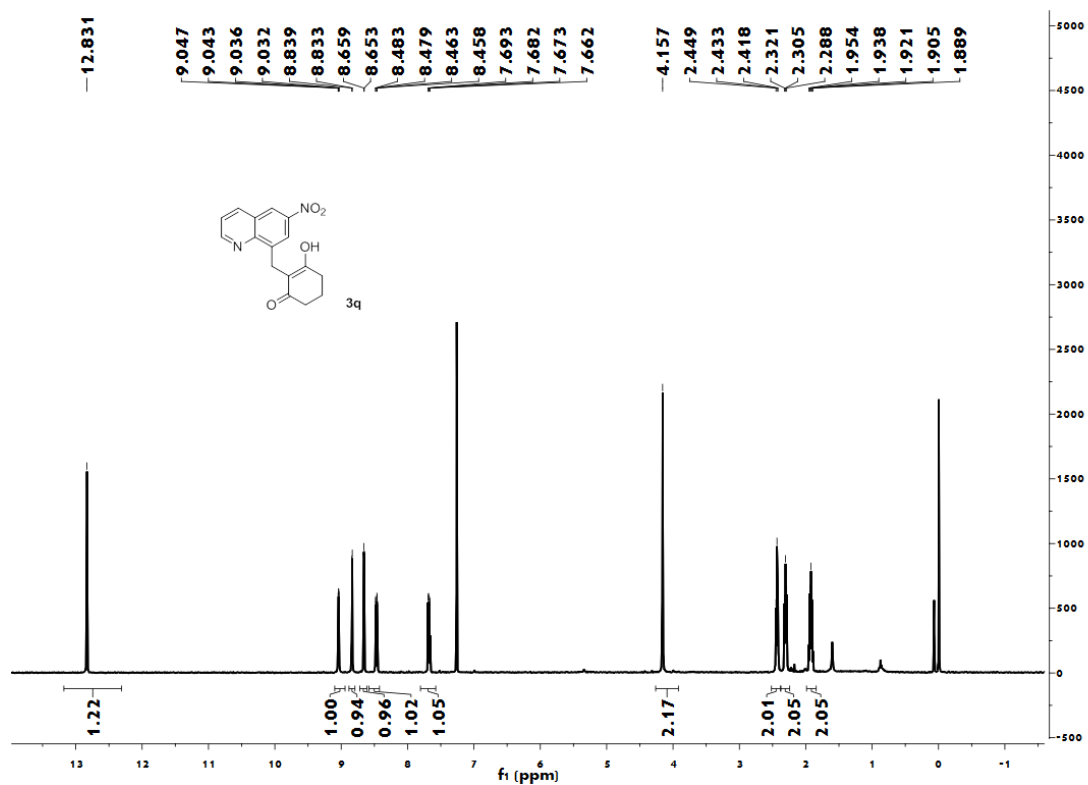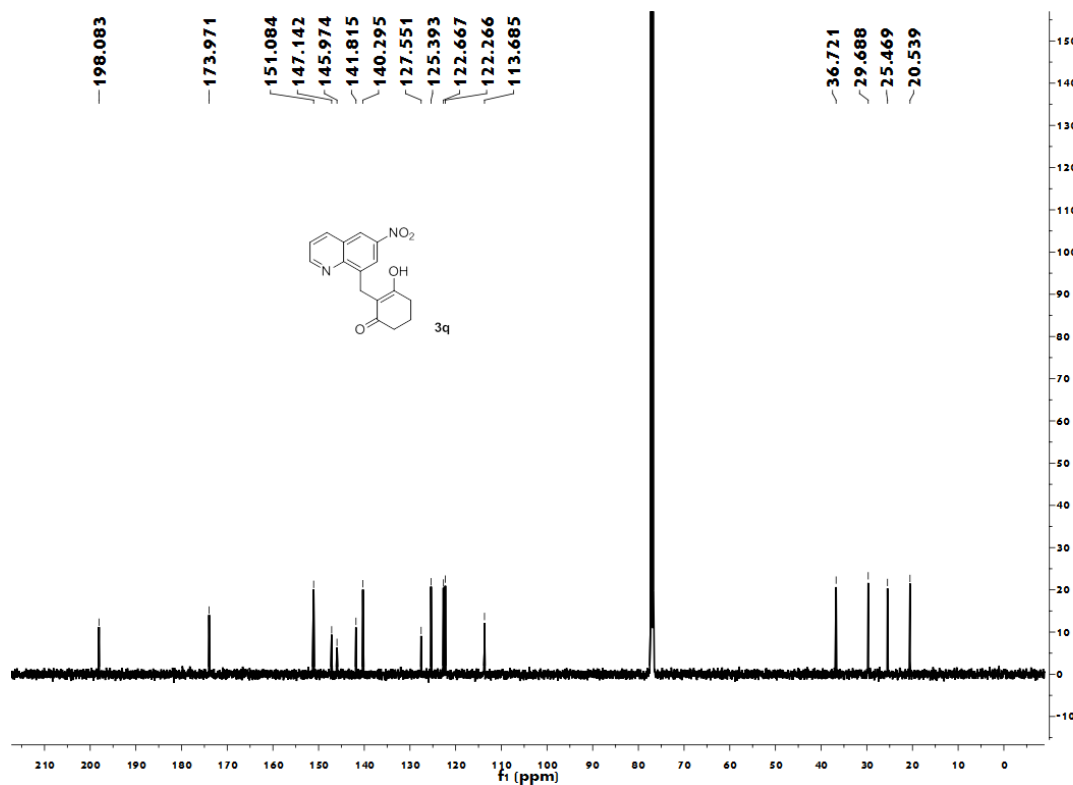

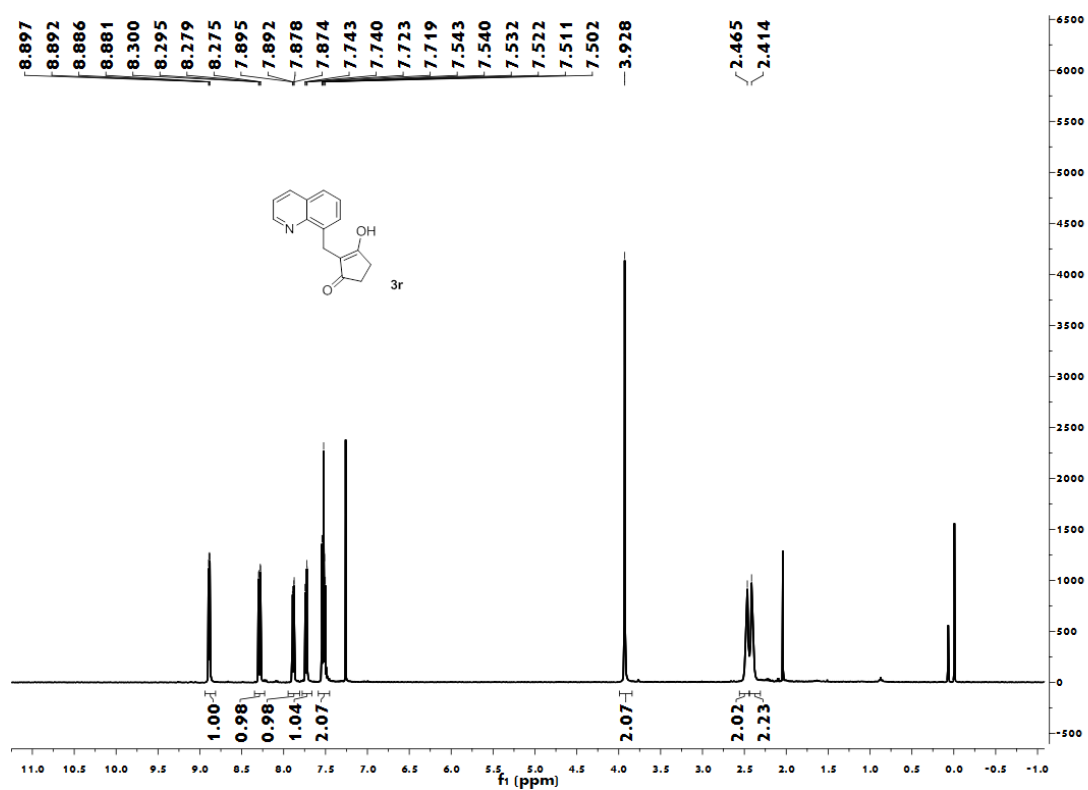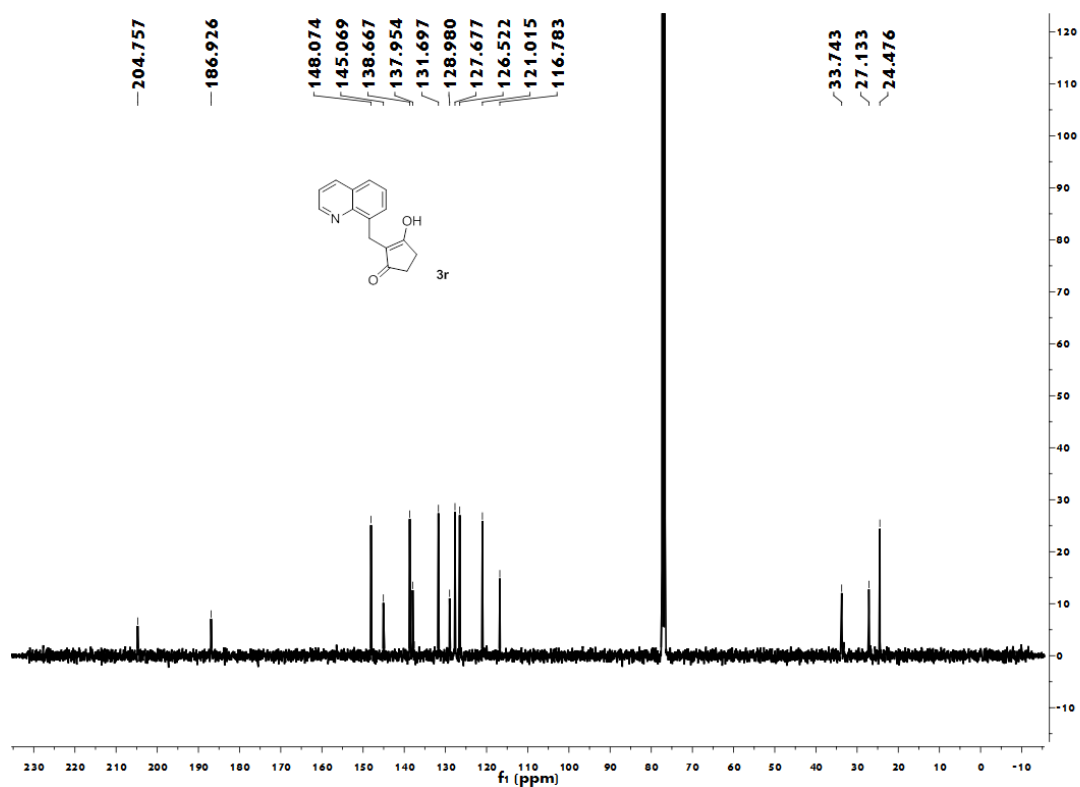

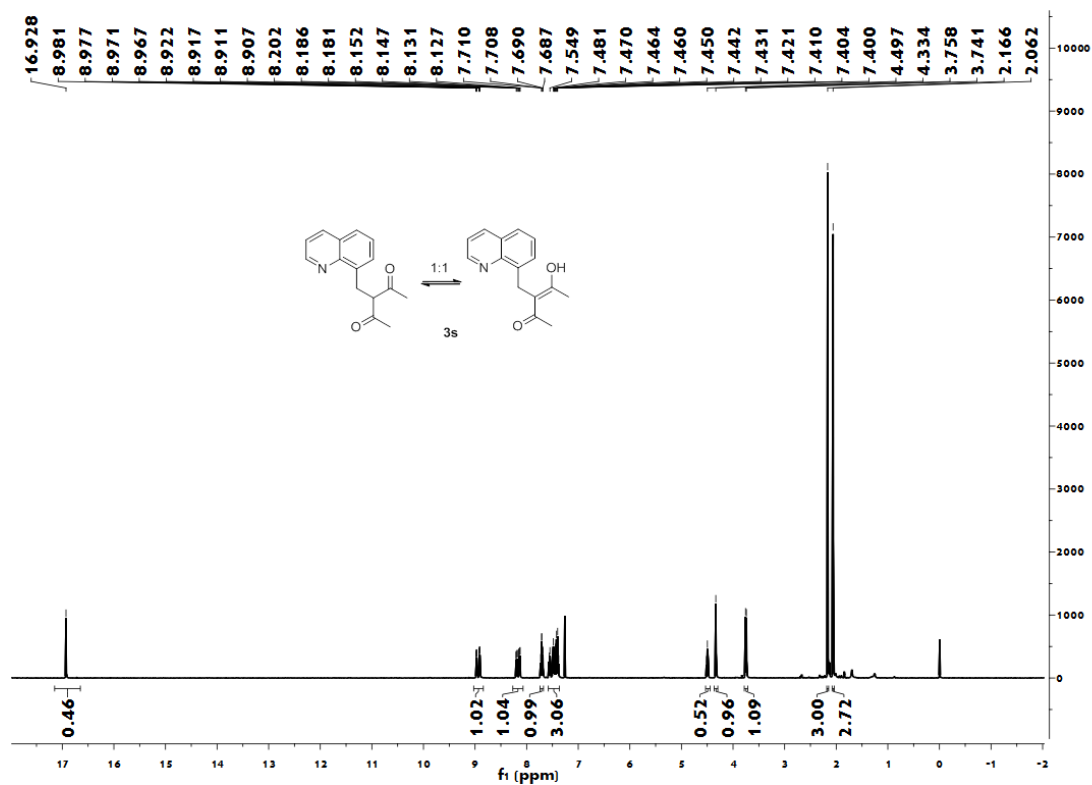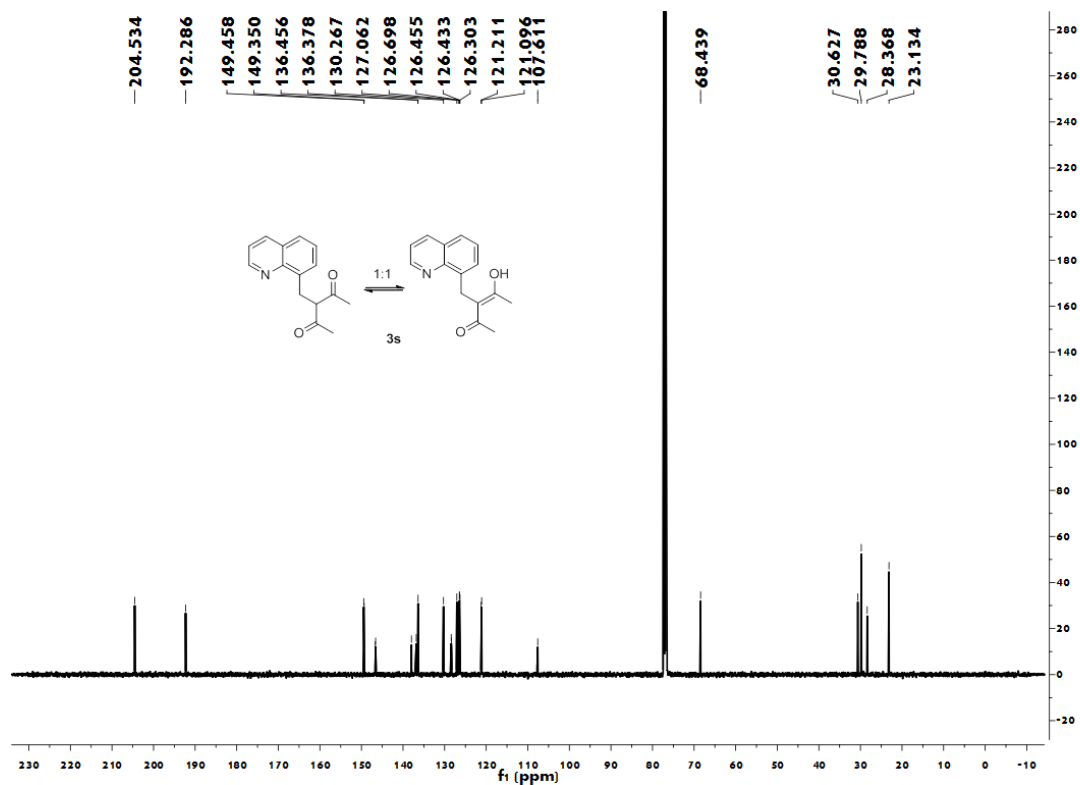

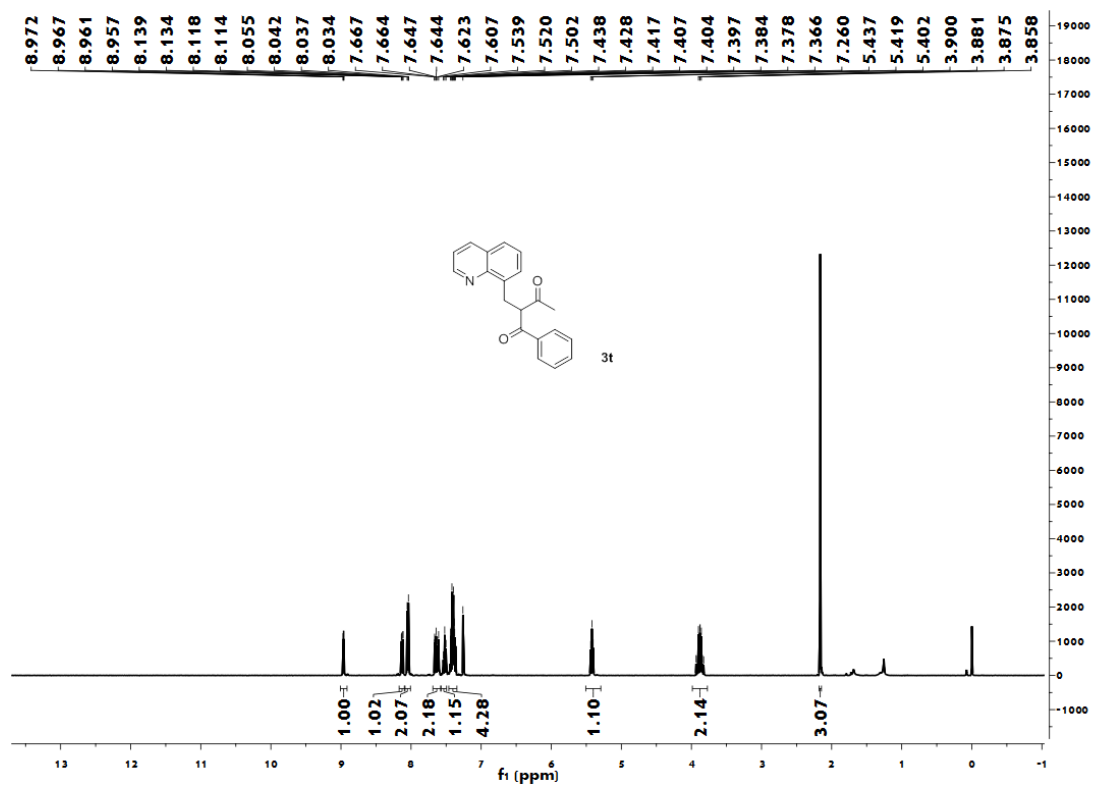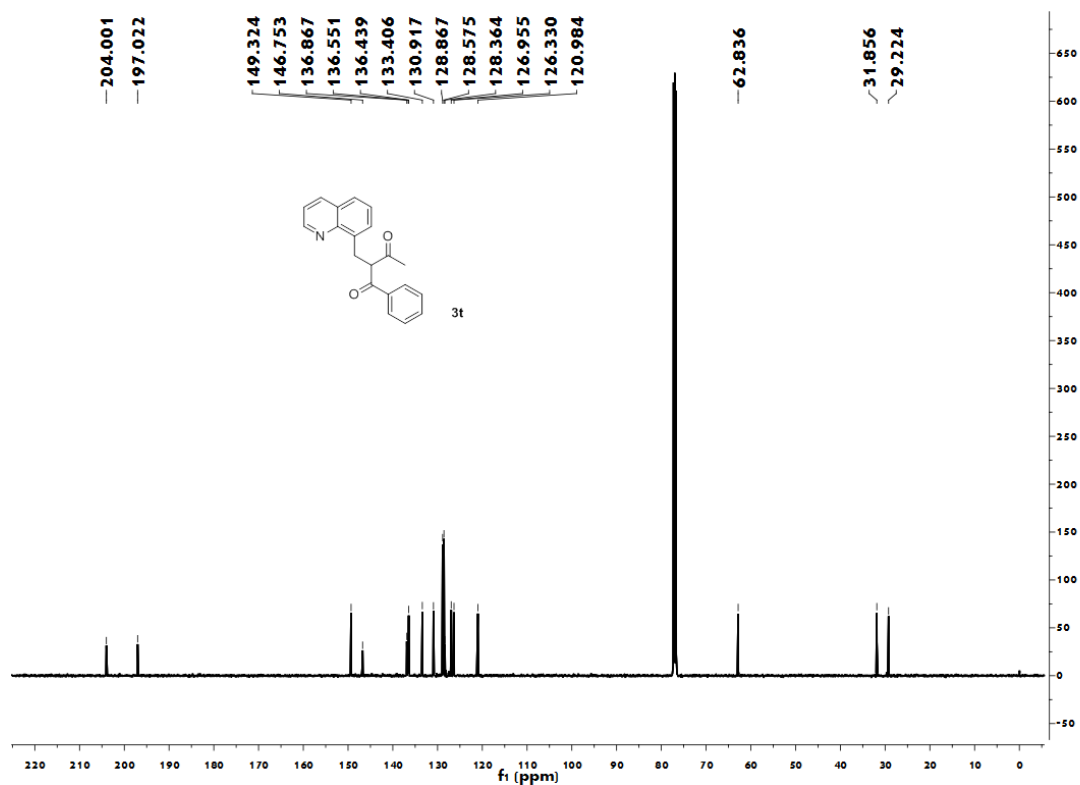

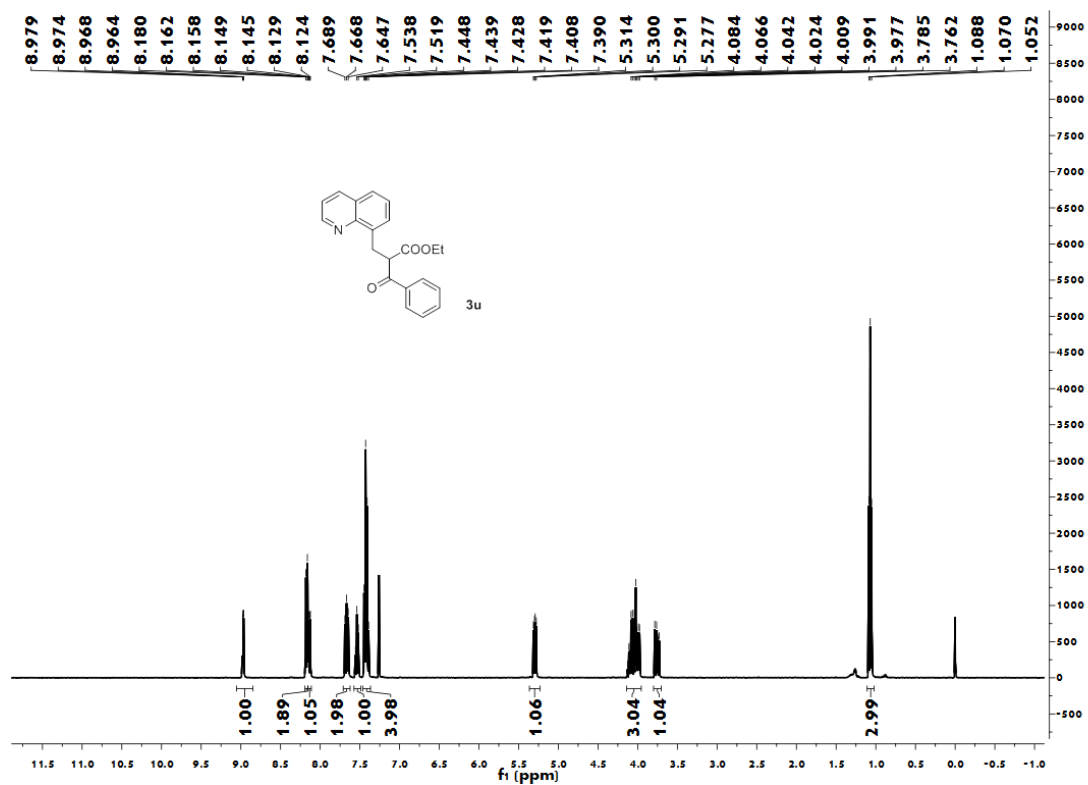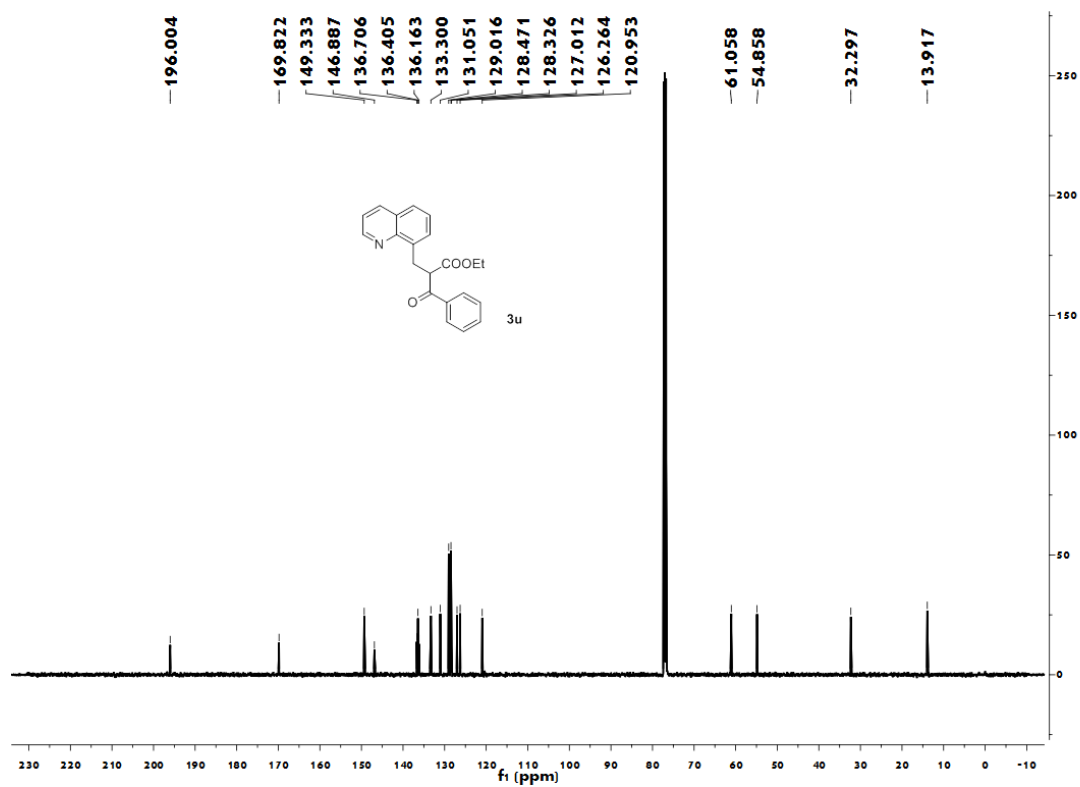



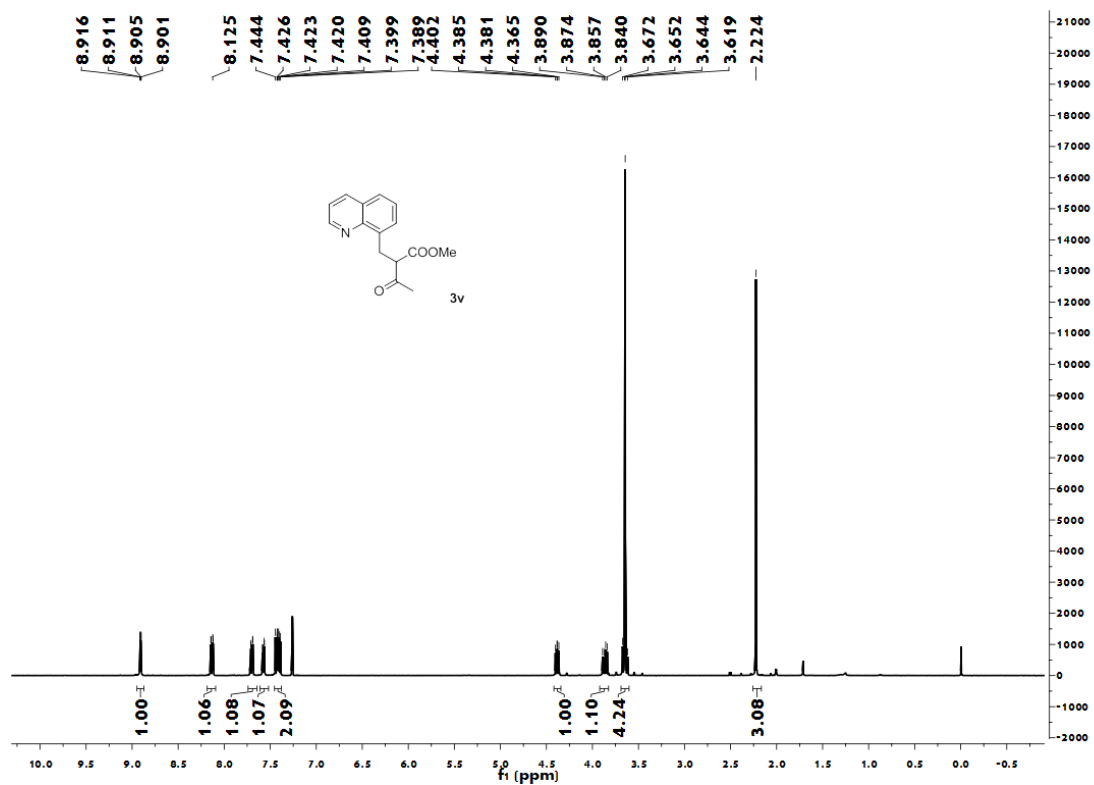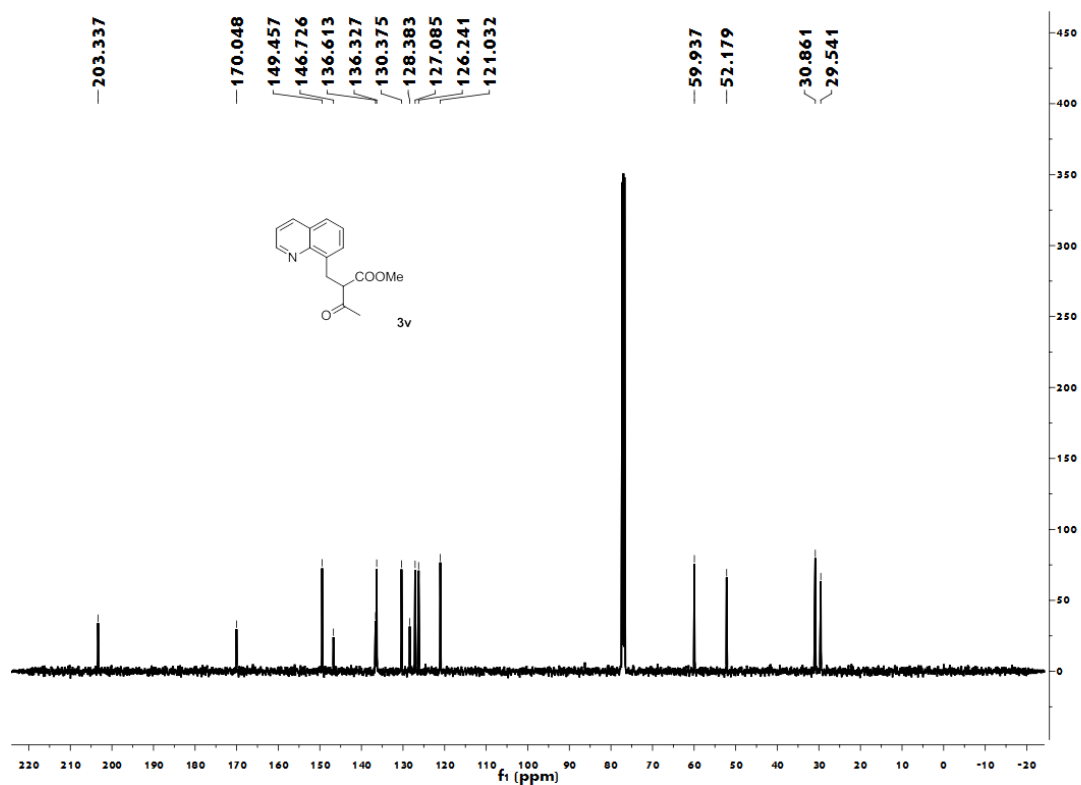

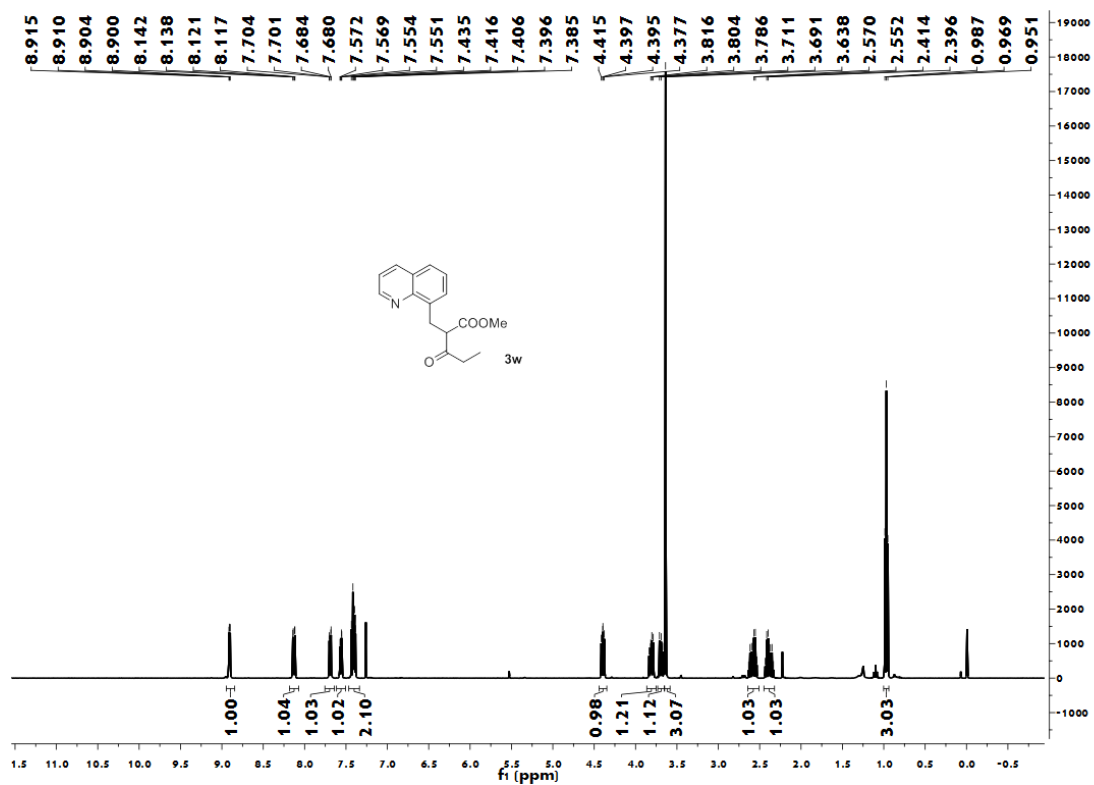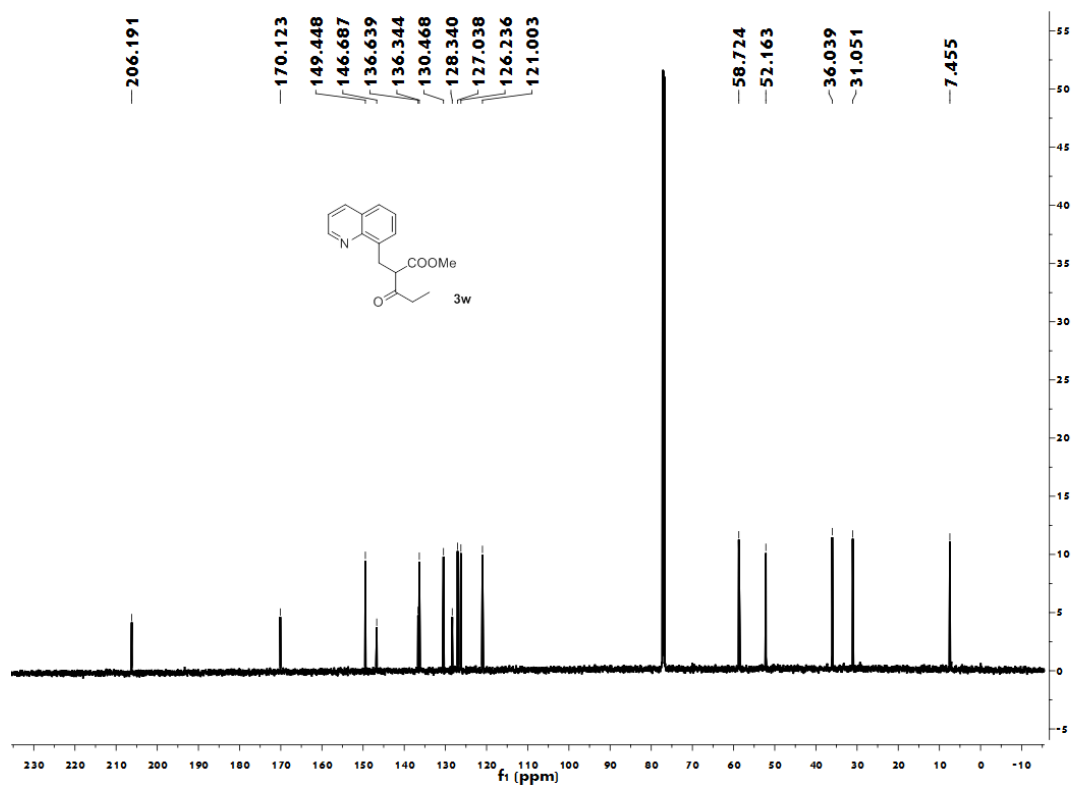

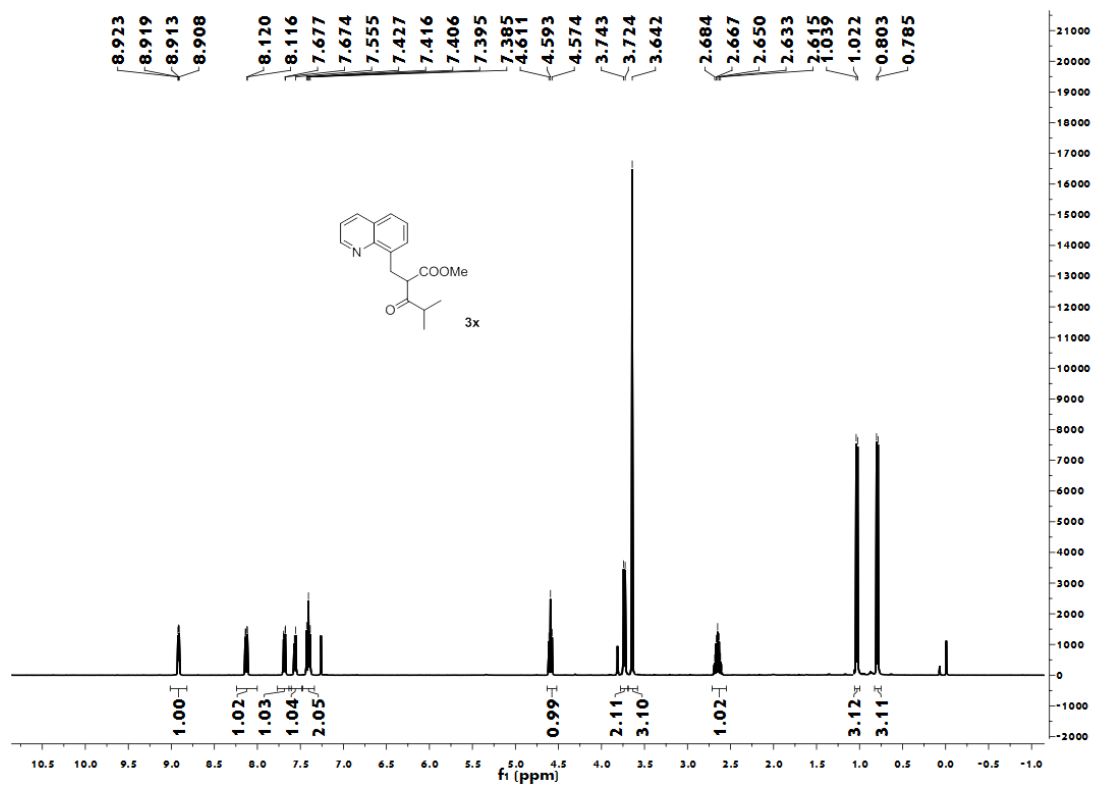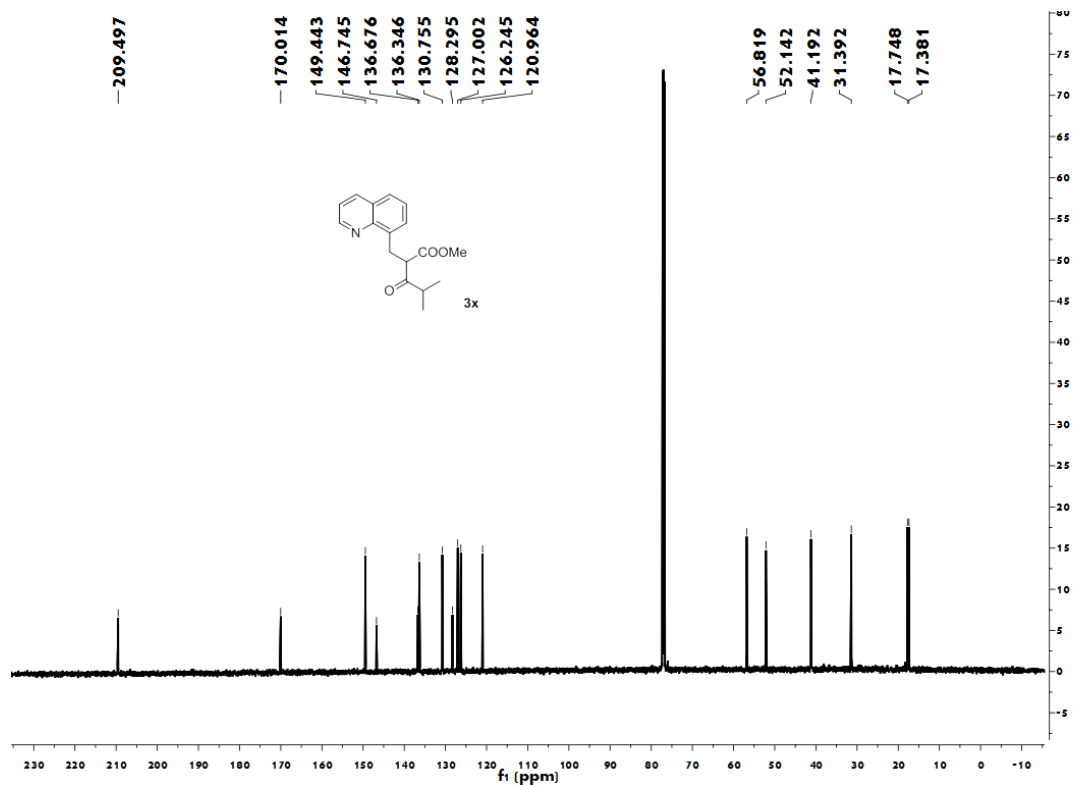

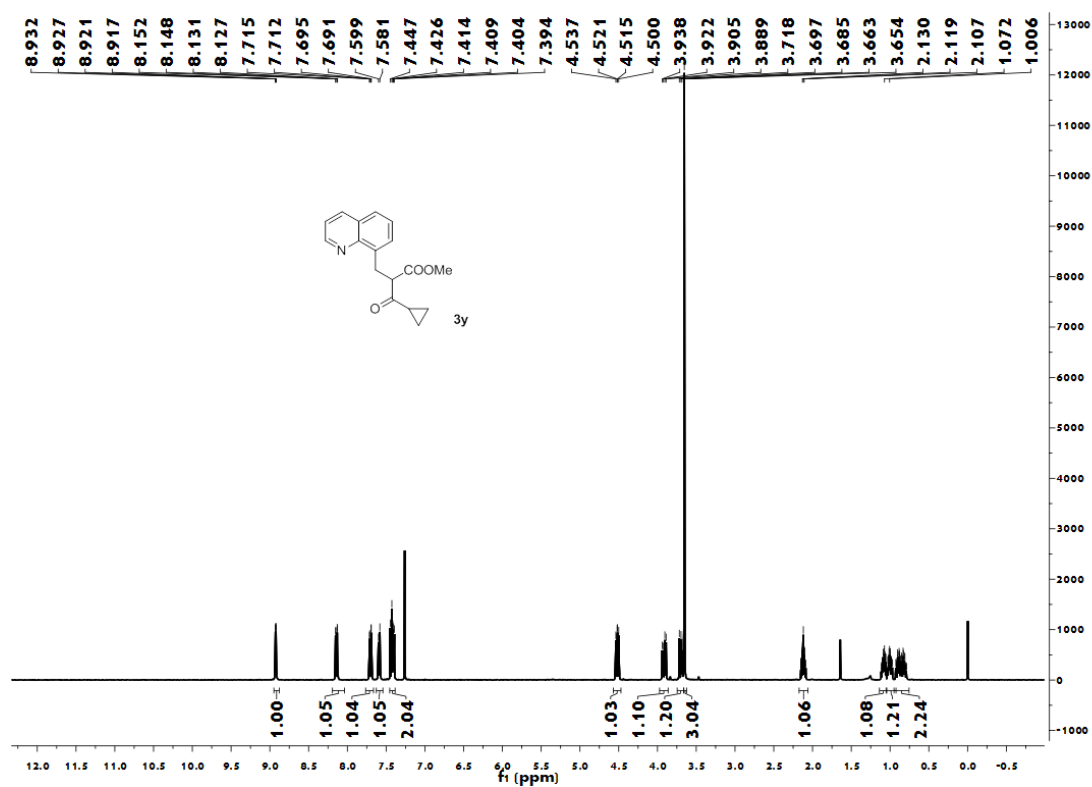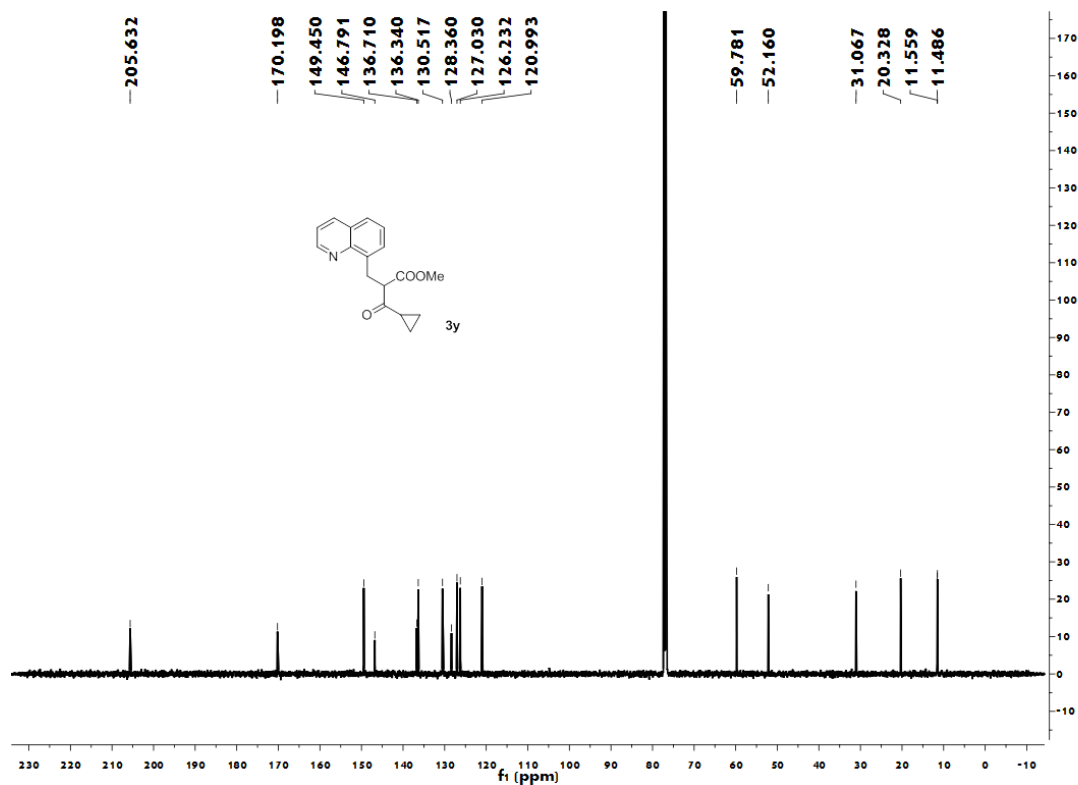

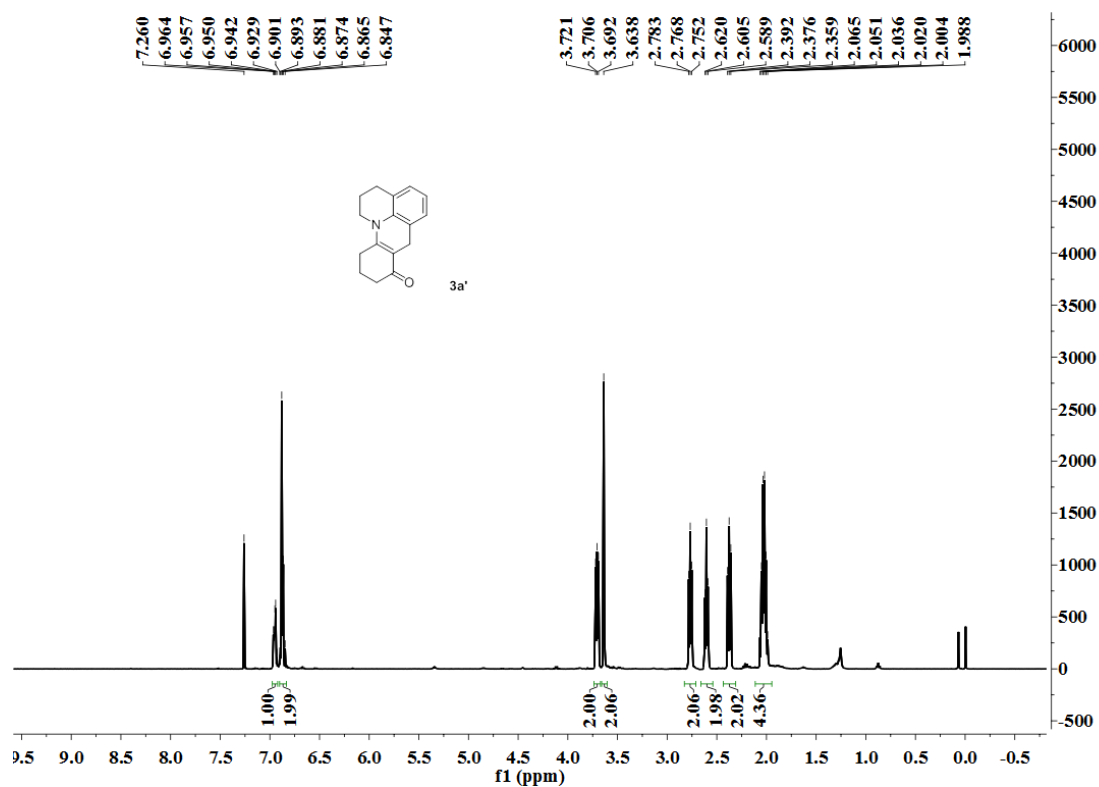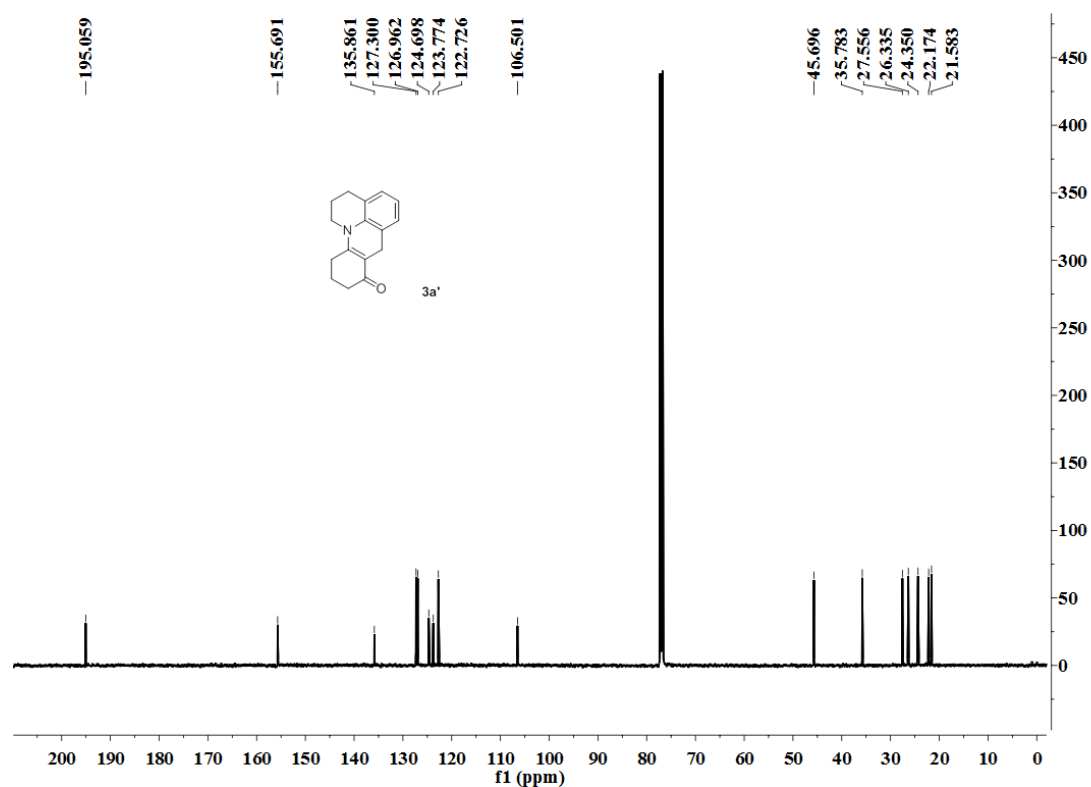

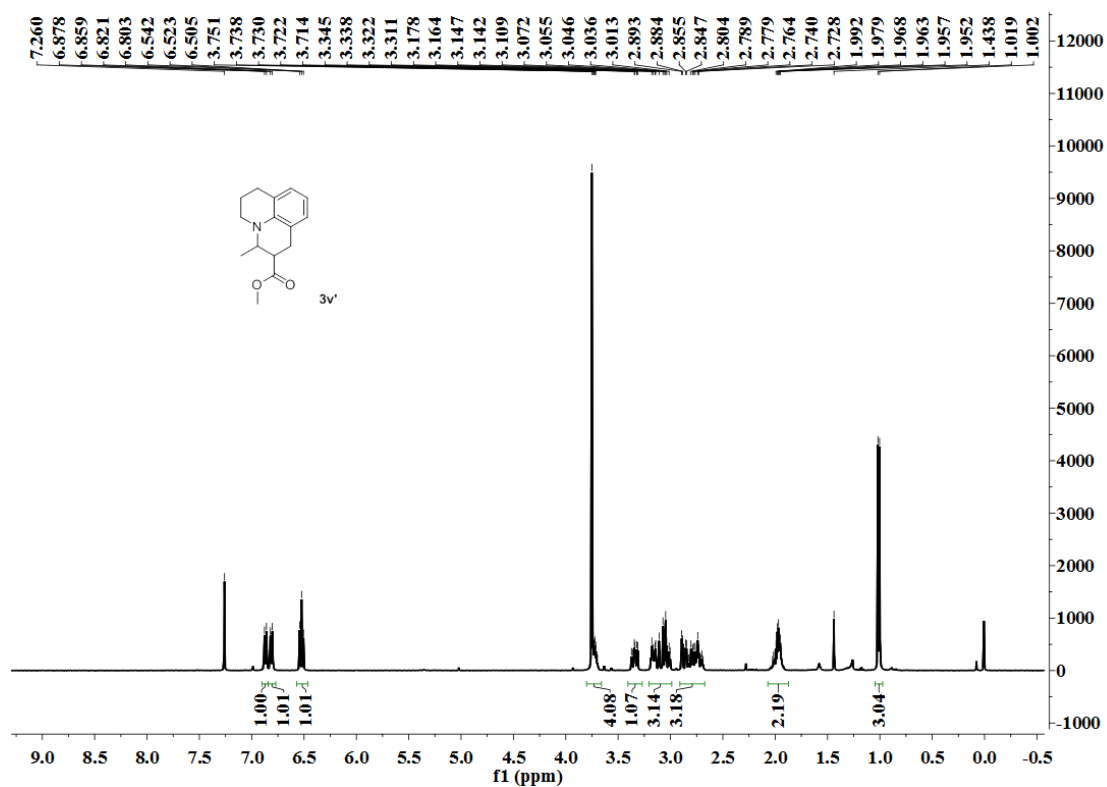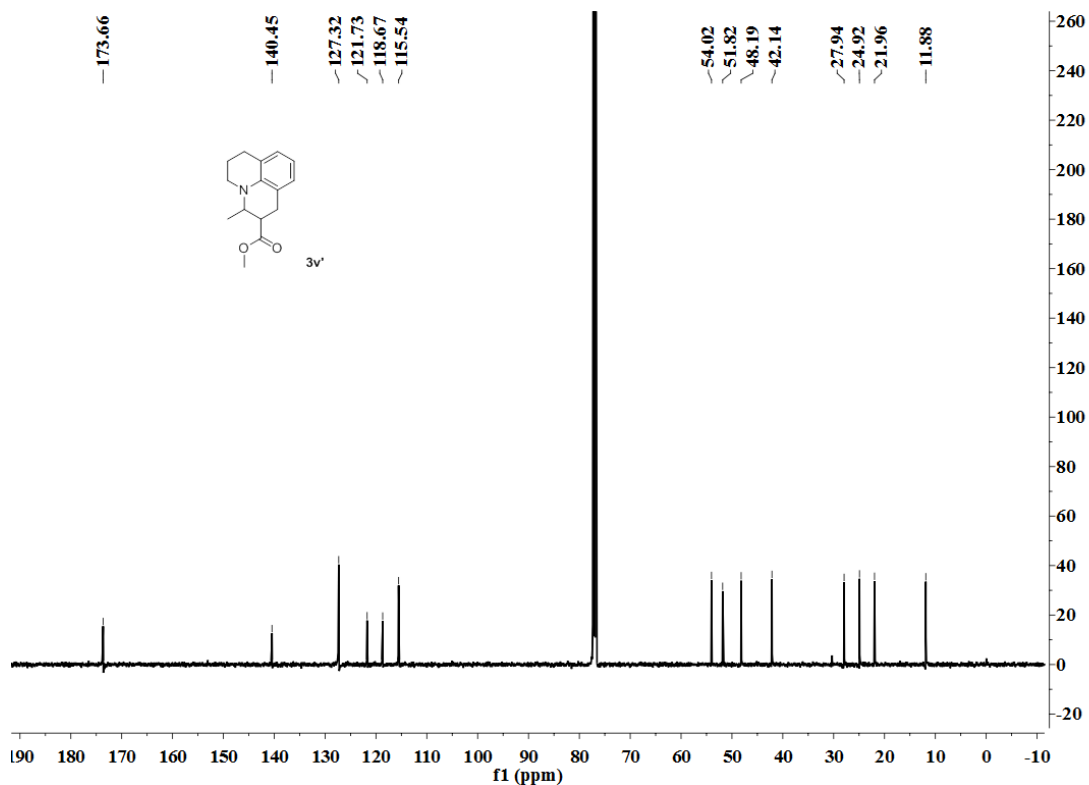

Supplement: c6cc03846h1.pdf [file c6cc03846h1.pdf]
